# Supplementary material for: Insights into topochemical versus stress-induced high-pressure reactivity of azobenzene by single crystal X-ray diffraction
Source: Royal Society of Chemistry journal article supplement (doi:10.1039/d5sc00432b), 2025-01-01
Supplement: d5sc00432b2.pdf [file d5sc00432b2.pdf]

# Supporting Information: Insights into Topochemical versus Stress-Induced High-Pressure Reactivity of Azobenzene by Single Crystal X-ray Diffraction

Milo Agati<sup>1,2</sup>, Sebastiano Romi<sup>1,2,3,\*</sup>, Samuele Fanetti<sup>1,4</sup>, Krzysztof  
Radacki<sup>5</sup>, Michael Hanfland<sup>6</sup>, Holger Braunschweig<sup>5</sup>, Todd B. Marder<sup>5</sup>,  
Stewart J. Clark<sup>7</sup>, Alexandra Friedrich<sup>5,\*</sup>, and Roberto Bini<sup>1,2,4</sup>

<sup>1</sup>LENS, European Laboratory for Non-linear Spectroscopy, Via N.  
Carrara 1, I-50019 Sesto Fiorentino, Firenze, Italy

<sup>2</sup>Dipartimento di Chimica “Ugo Schiff”, Università di Firenze, Via della  
Lastruccia 3, I-50019 Sesto Fiorentino, Italy

<sup>3</sup>INO-CNR, Istituto Nazionale di Ottica, Via N. Carrara 1, I-50019  
Sesto Fiorentino, Firenze, Italy

<sup>4</sup>ICCOM-CNR, Istituto di Chimica dei Composti OrganoMetallici, Via  
Madonna del Piano 10, I-50019 Sesto Fiorentino, Firenze, Italy

<sup>5</sup>Julius-Maximilians-Universität Würzburg, Institut für Anorganische  
Chemie, Am Hubland, 97074 Würzburg, Germany

<sup>6</sup>European Synchrotron Radiation Facility, ESRF, 71 Avenue des  
Martyrs, CS40220, 38043 Cedex 9 Grenoble, France

<sup>7</sup>Department of Physics, University of Durham, Science Labs, South  
Road, Durham DH1 3LE, UK

# 1 Supporting Information

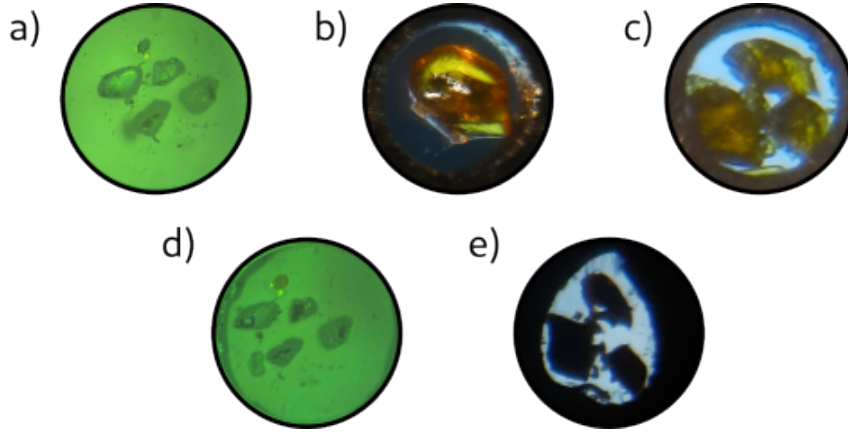

Figure S1: Photos of various samples at different experimental conditions: a) low pressure azobenzene single crystals in neon, sample employed for SC-XRD analysis; b) and c) low pressure azobenzene in argon, samples employed for FTIR analysis; d) high pressure ( $\sim 30$  GPa) azobenzene in neon; e) ambient pressure recovered product of c) after compressing the sample up to 30 GPa. As a reference, the diameter of the samples above corresponds to ca.  $150\text{ }\mu\text{m}$ . The azobenzene crystals employed for the SC-XRD measurements are the bottom two crystals in samples a) and d), and were loaded together with two other single crystals of stilbene (top two crystals), ruby balls, and a small piece of gold.

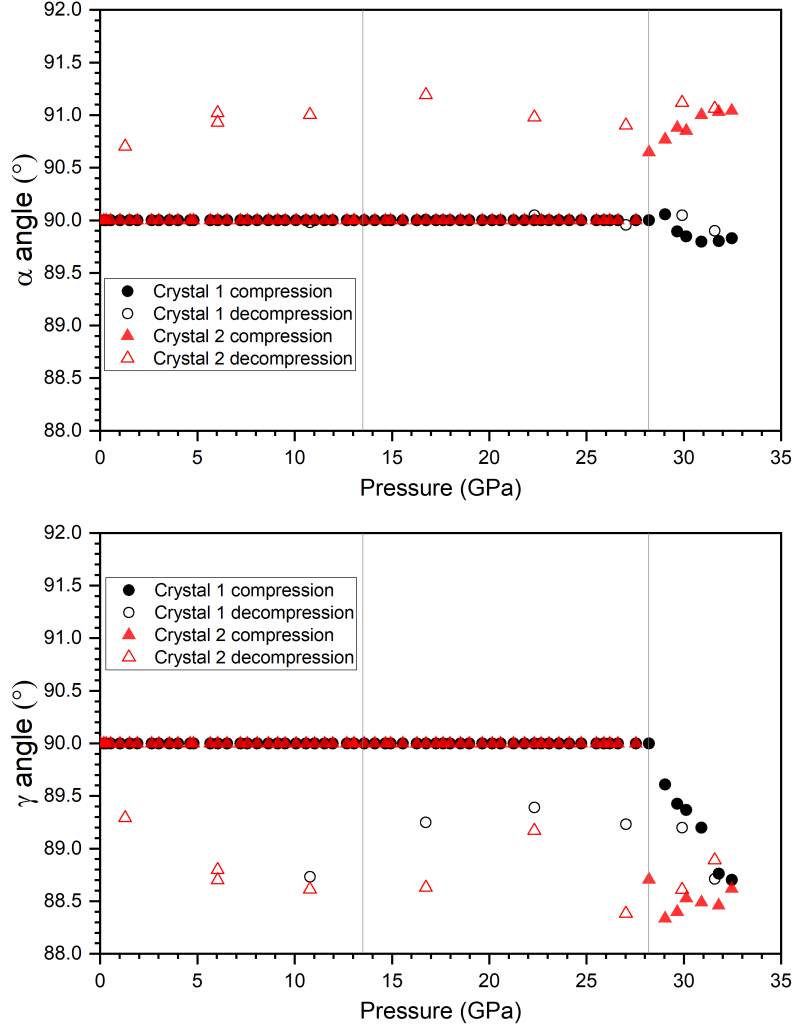

Figure S2: Pressure evolution of the  $\alpha$  angle (top) and  $\gamma$  angle (bottom) of azobenzene on compression up to 32.46(6) GPa (filled symbols) and subsequent decompression (empty symbols). The two vertical lines just above 13 and 28 GPa demarcate the beginning of the high-pressure phase and polymer phase, respectively. While the angles remain 90° across the phase transition at 13 GPa, they deviate slightly from 90° in the polymer phase above 28 GPa and on decompression.

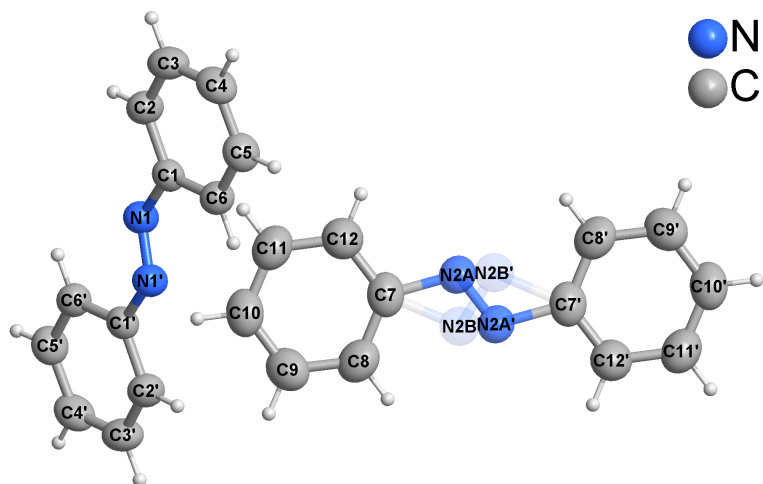

Figure S3: The solid-state molecular structure and atom labeling of the two symmetry-independent molecules A (left) and B (right) of azobenzene, determined by single-crystal X-ray diffraction at 298 K. All ellipsoids are drawn at the 50% probability level, and H atoms are omitted for clarity. Both molecules have inversion symmetry. One of the molecules (B) shows a pedal-motion-type disorder and the site-occupation factor is expressed by the opacity of the nitrogen atom.

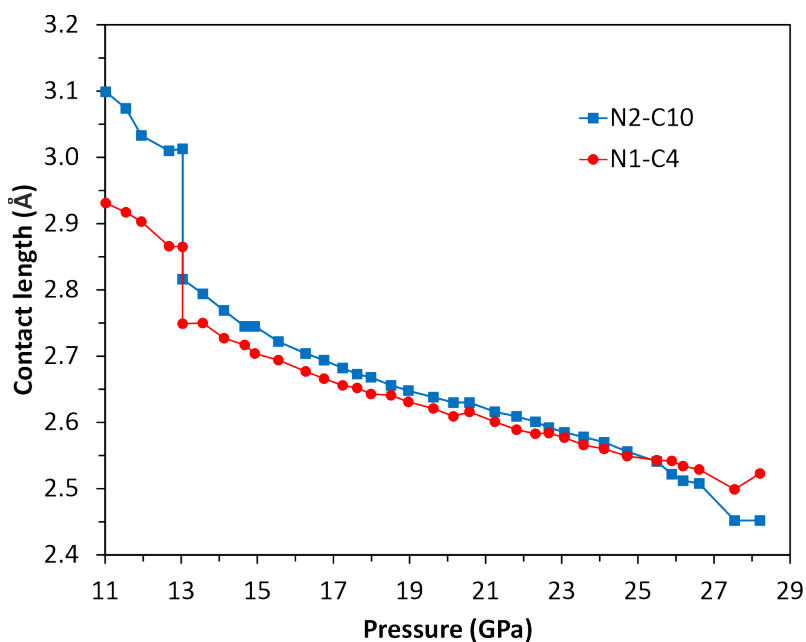

Figure S4: Short intermolecular C $\cdots$ N contacts in the azobenzene HP phase as a function of pressure from 11 GPa up to the highest pressure ( $\sim$ 28 GPa) at which the structure was refined.

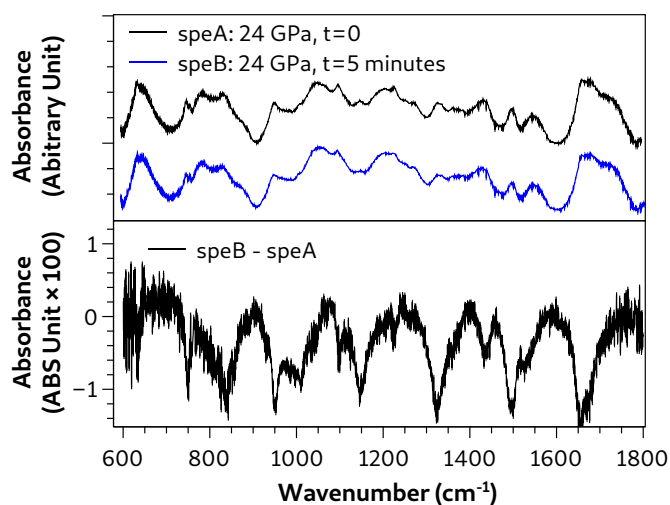

Figure S5: Upper panel: Infrared spectra of azobenzene compressed using argon as PTM in the 700-1700  $\text{cm}^{-1}$  spectral region: the two spectra (black and blue traces) were acquired at 24 GPa separated by 5 minutes. Lower panel: difference spectrum calculated subtracting the intensities of the aforementioned spectra, the intense negative bands are due to the consumption of the reagent due to the reaction.

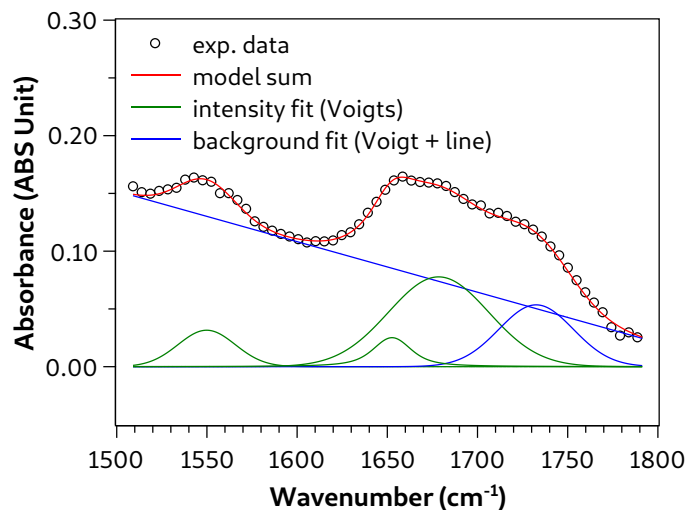

Figure S6: Example of the area determination of the vibrational bands performed to calculate the azobenzene reaction kinetics. The vibrational bands shown were chosen to measure the absorbance variation over time, as they are intense and not overlapped with other absorptions. The example provided depicts a spectral window of the azobenzene infrared spectra compressed with argon measured at 24 GPa. For the sake of clarity, only 1/20 of the experimental data have been reported as black empty dots. The fit was performed employing three Voigt functions to fit the experimental data (green curves in the figure). An additional Voigt function was employed as a background, together with a straight line (blue curves). The fit is shown as a red trace. To minimize the fit error, subsequent spectra were fitted varying only the intensity of the Voigt functions and the intercept of the straight line, maintaining fixed all the other parameters (center, shape, gwidth of the Voigts, slope of the straight line).

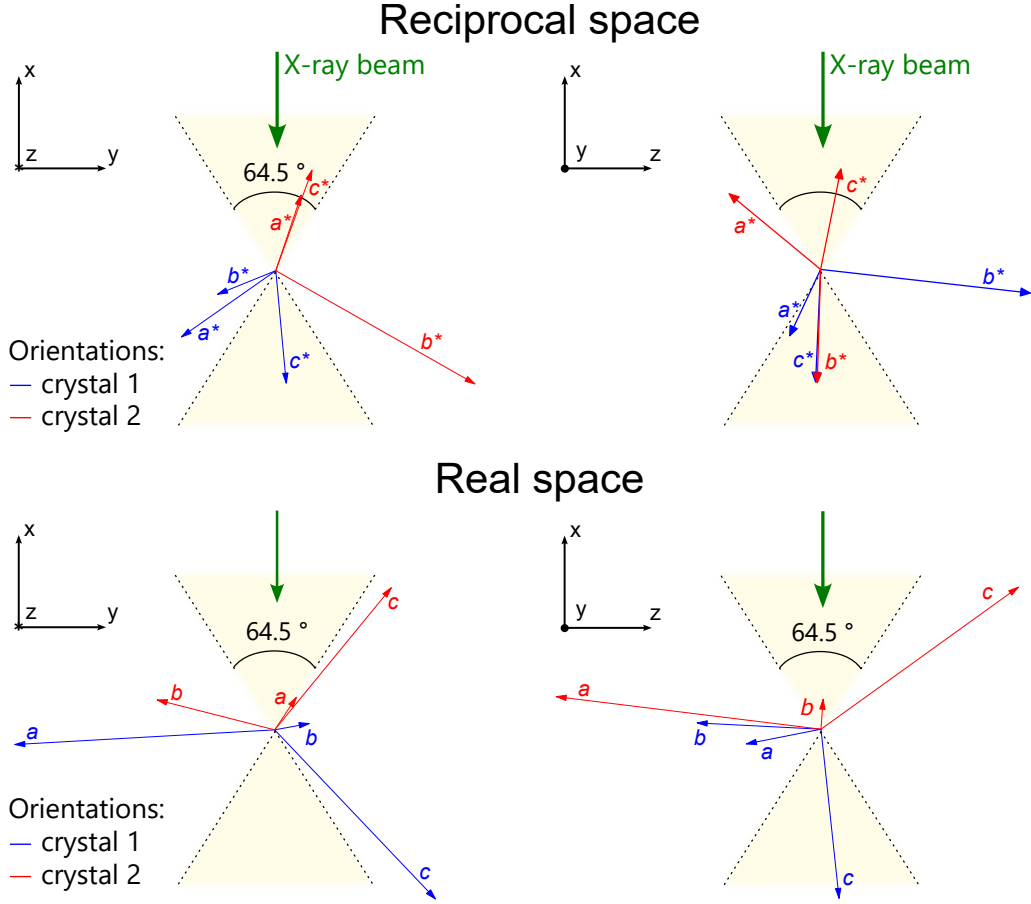

Figure S7: Unit cell axes in the reciprocal (upper images) and real space (bottom images) of the two azobenzene crystals loaded in the DAC. In the employed orthogonal system, the X-ray beam direction aligns with the  $x$  axis and the crystals inside the DAC lie on the  $yz$  plane at  $\omega = 0$ . The coordinates for all the vectors in the  $xyz$  frame of reference are reported in Table S14. The vectors for crystal 1 (blue) and crystal 2 (red) are reported as projections onto the  $xy$  (left) and  $xz$  planes (right). The unit cell metric of crystal 2 is rotated by  $161.9^\circ$  around the vector  $(0.74 -0.28 -0.61)$  in reciprocal space or  $[0.46 -0.88 -0.13]$  in direct space with respect to that of crystal 1. The  $0.5^\circ$   $\omega$ -scanning across the DAC's aperture ( $64.5^\circ$ , represented by yellow shaded areas) ensures that most of the reciprocal space gets probed.

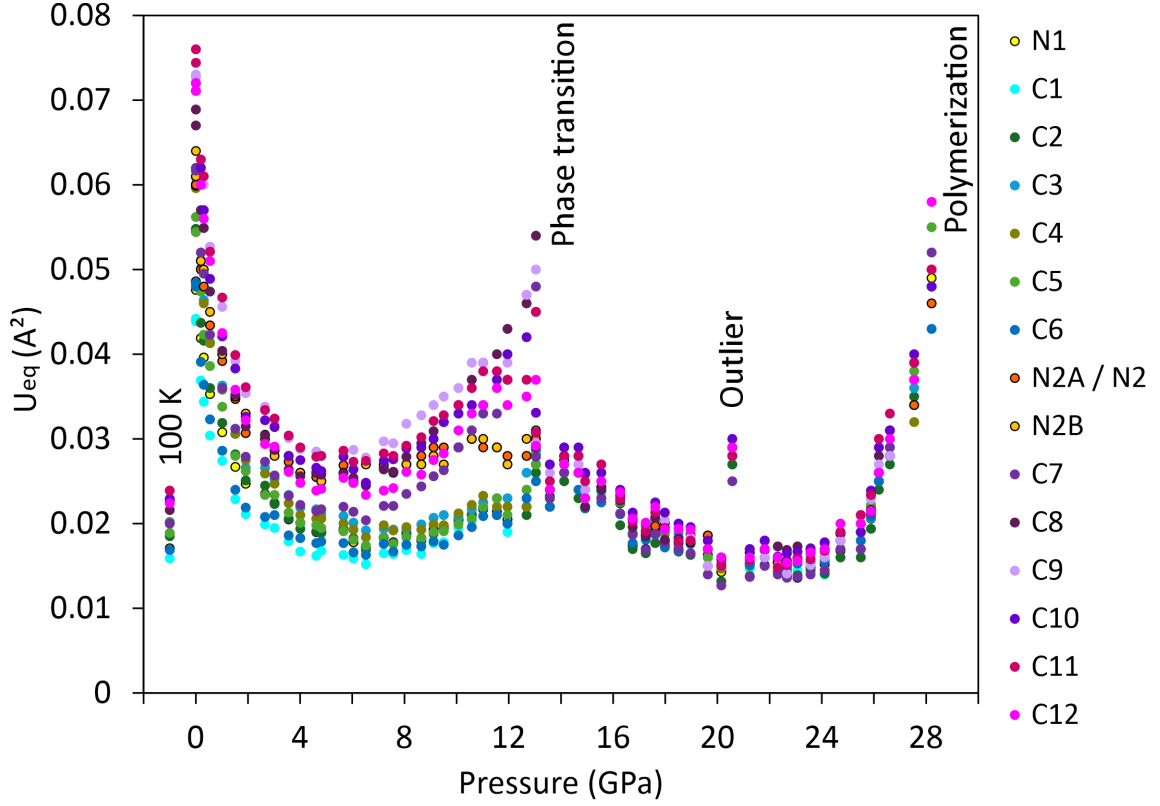

Figure S8: Plot of the equivalent isotropic displacement parameters of all the atoms as a function of pressure. At ambient pressure, data from the synchrotron experiment in the DAC and from in-house measurements on a free crystal are included in the plot and they produce very similar values. The  $U_{eq}$  at 100 K at ambient pressure are also plotted for comparison. A decrease of all the  $U_{eq}$  with increasing pressure is expected due to the density increase of the crystal. Before the phase transition, molecule B (atoms N2A/N2B, C7–C12) has larger values of  $U_{eq}$  than molecule A and its behavior closely resembles the pedal motion disorder (Figure 4 of the main text). Just before the phase transition at 13 GPa, the isotropic displacement parameters first increase and then continue to decrease, with the  $U_{eq}$  of the molecule B that have an abrupt drop in value. Just before the polymerization threshold at 28 GPa, another rapid increase is observed which is indicative of a reactive state.



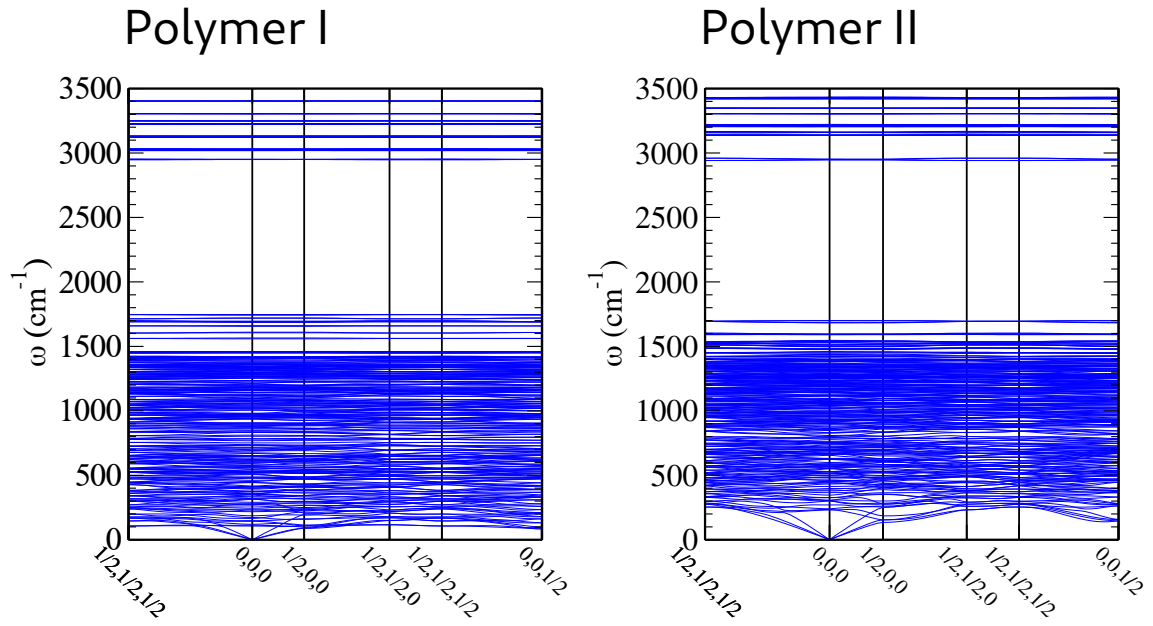

Figure S9: Calculated phonon dispersion curves at 30 GPa for polyazobenzene "polymer I" and "polymer II", respectively. Both structures have no imaginary vibrational modes, ensuring that the calculated geometries are in a local or global energy minimum.

**Table S1.** Single-crystal X-ray diffraction data and structure refinements of **azobenzene** at 100 K and 298 K and ambient pressure.

|                                                          |                                                |                                                |
|----------------------------------------------------------|------------------------------------------------|------------------------------------------------|
| CCDC                                                     | 2336566                                        | 2336607                                        |
| Empirical formula                                        | C <sub>12</sub> H <sub>10</sub> N <sub>2</sub> | C <sub>12</sub> H <sub>10</sub> N <sub>2</sub> |
| $M_r$ / g·mol <sup>-1</sup>                              | 182.22                                         | 182.22                                         |
| $T$ / K                                                  | 100(2)                                         | 298(2)                                         |
| Radiation, $\lambda$ / Å                                 | Cu-K $\alpha$ , 1.54184                        | Cu-K $\alpha$ , 1.54184                        |
| Crystal size/mm <sup>3</sup>                             | 0.04×0.13×0.21                                 | 0.27×0.17×0.08                                 |
| Crystal color, habit                                     | orange plate                                   | orange plate                                   |
| Crystal system                                           | Monoclinic                                     | Monoclinic                                     |
| Space group                                              | $P2_1/c$                                       | $P2_1/c$                                       |
| $a$ / Å                                                  | 14.9840(4)                                     | 15.2269(4)                                     |
| $b$ / Å                                                  | 5.69830(10)                                    | 5.78897(13)                                    |
| $c$ / Å                                                  | 12.0341(3)                                     | 12.1743(3)                                     |
| $\alpha$ / °                                             | 90                                             | 90                                             |
| $\beta$ / °                                              | 112.452(3)                                     | 112.455(3)                                     |
| $\gamma$ / °                                             | 90                                             | 90                                             |
| Volume / Å <sup>3</sup>                                  | 949.63(4)                                      | 991.78(5)                                      |
| $Z$                                                      | 4                                              | 4                                              |
| $\rho_{\text{calc}}$ / g·cm <sup>-3</sup>                | 1.275                                          | 1.220                                          |
| $\mu$ / mm <sup>-1</sup>                                 | 0.603                                          | 0.577                                          |
| $F(000)$                                                 | 384                                            | 384                                            |
| $\theta$ range / °                                       | 3.191 – 74.476                                 | 3.140 – 74.423                                 |
| Reflections collected                                    | 10160                                          | 10691                                          |
| Unique reflections                                       | 1920                                           | 1997                                           |
| Parameters / restraints                                  | 168 / 0                                        | 138 / 36                                       |
| GooF on $F^2$                                            | 1.060                                          | 1.056                                          |
| $R_1$ [ $I \geq 2\sigma(I)$ ]                            | 0.0335                                         | 0.0366                                         |
| $wR_2$ [all data]                                        | 0.0856                                         | 0.1014                                         |
| Max. / min. residual electron density/ e·Å <sup>-3</sup> | 0.244 / -0.164                                 | 0.125 / -0.112                                 |
| Disorder / %                                             | 0 (< 3)                                        | 17(2)                                          |

**Table S2:** Single-crystal X-ray diffraction data and structure refinements of monoclinic azobenzene, C<sub>12</sub>H<sub>10</sub>N<sub>2</sub> (space group *P*2<sub>1</sub>/*c*, *Z* = 4, Formula weight: 182.22 g·mol<sup>−1</sup>, *F*(000) = 384, *T* = 298(2) K). Combined refinement of the data sets of two crystals if not otherwise stated.

|                                                                                      |                                                                    |                                                                    |                                                                    |                                                                    |                                                                    |
|--------------------------------------------------------------------------------------|--------------------------------------------------------------------|--------------------------------------------------------------------|--------------------------------------------------------------------|--------------------------------------------------------------------|--------------------------------------------------------------------|
| Pressure / GPa                                                                       | 0.0001                                                             | 0.19(2)                                                            | 0.31(2)                                                            | 0.54(2)                                                            | 1.02(2)                                                            |
| CCDC number                                                                          | 2336562                                                            | 2336563                                                            | 2336564                                                            | 2336565                                                            | 2336588                                                            |
| $\lambda$ / Å, radiation type                                                        | 0.4100, synchrotron                                                |                                                                    |                                                                    |                                                                    |                                                                    |
| <i>a</i> / Å                                                                         | 15.223(14)                                                         | 15.088(13)                                                         | 14.998(11)                                                         | 14.890(10)                                                         | 14.710(10)                                                         |
| <i>b</i> / Å                                                                         | 5.7851(5)                                                          | 5.7289(4)                                                          | 5.6940(3)                                                          | 5.6496(3)                                                          | 5.5772(3)                                                          |
| <i>c</i> / Å                                                                         | 12.174(4)                                                          | 12.059(4)                                                          | 11.992(3)                                                          | 11.905(3)                                                          | 11.759(3)                                                          |
| $\alpha$ / °                                                                         | 90                                                                 | 90                                                                 | 90                                                                 | 90                                                                 | 90                                                                 |
| $\beta$ / °                                                                          | 112.45(7)                                                          | 112.42(7)                                                          | 112.43(6)                                                          | 112.44(5)                                                          | 112.39(5)                                                          |
| $\gamma$ / °                                                                         | 90                                                                 | 90                                                                 | 90                                                                 | 90                                                                 | 90                                                                 |
| Volume / Å <sup>3</sup>                                                              | 990.9(11)                                                          | 963.6(10)                                                          | 946.6(9)                                                           | 925.6(7)                                                           | 892.0(7)                                                           |
| $\rho_{\text{calc}}$ / g·cm <sup>−3</sup>                                            | 1.221                                                              | 1.256                                                              | 1.279                                                              | 1.308                                                              | 1.357                                                              |
| $\mu$ / mm <sup>−1</sup>                                                             | 0.033                                                              | 0.034                                                              | 0.035                                                              | 0.036                                                              | 0.037                                                              |
| $\theta$ range / °                                                                   | 1.930 – 21.468                                                     | 1.949 – 21.261                                                     | 1.960 – 21.393                                                     | 1.974 – 21.427                                                     | 1.999 – 20.999                                                     |
| Unique reflections                                                                   | 4002                                                               | 4279                                                               | 4294                                                               | 4254                                                               | 4288                                                               |
| Unique or all reflections<br>[ <i>I</i> > 2 $\sigma$ ( <i>I</i> )]                   | 2663                                                               | 2992                                                               | 3112                                                               | 3205                                                               | 3223                                                               |
| Parameters / restraints                                                              | 139 / 96                                                           | 138 / 96                                                           | 138 / 96                                                           | 138 / 96                                                           | 138 / 96                                                           |
| GooF on <i>F</i> <sup>2</sup>                                                        | 1.045                                                              | 1.051                                                              | 1.078                                                              | 1.058                                                              | 1.077                                                              |
| <i>R</i> <sub>1</sub> , <i>wR</i> <sub>2</sub> [ <i>I</i> > 2 $\sigma$ ( <i>I</i> )] | <i>R</i> <sub>1</sub> = 0.0609,<br><i>wR</i> <sub>2</sub> = 0.1434 | <i>R</i> <sub>1</sub> = 0.0620,<br><i>wR</i> <sub>2</sub> = 0.1587 | <i>R</i> <sub>1</sub> = 0.0591,<br><i>wR</i> <sub>2</sub> = 0.1652 | <i>R</i> <sub>1</sub> = 0.0579,<br><i>wR</i> <sub>2</sub> = 0.1579 | <i>R</i> <sub>1</sub> = 0.0554,<br><i>wR</i> <sub>2</sub> = 0.1580 |
| <i>R</i> <sub>1</sub> , <i>wR</i> <sub>2</sub> (all data)                            | <i>R</i> <sub>1</sub> = 0.0935,<br><i>wR</i> <sub>2</sub> = 0.1625 | <i>R</i> <sub>1</sub> = 0.0862,<br><i>wR</i> <sub>2</sub> = 0.1783 | <i>R</i> <sub>1</sub> = 0.0795,<br><i>wR</i> <sub>2</sub> = 0.1784 | <i>R</i> <sub>1</sub> = 0.0746,<br><i>wR</i> <sub>2</sub> = 0.1700 | <i>R</i> <sub>1</sub> = 0.0718,<br><i>wR</i> <sub>2</sub> = 0.1688 |
| $\Delta\rho_{\text{max}} / \Delta\rho_{\text{min}}$ / e·Å <sup>−3</sup>              | 0.178 / −0.151                                                     | 0.201 / −0.185                                                     | 0.184 / −0.162                                                     | 0.224 / −0.181                                                     | 0.265 / −0.185                                                     |
| Disorder / %                                                                         | 15(2)                                                              | 14(2)                                                              | 12(2)                                                              | 10(2)                                                              | 8(1)                                                               |

**Table S2 (continued).**

|                                                                                      |                                                                    |                                                                    |                                                                    |                                                                    |                                                                    |
|--------------------------------------------------------------------------------------|--------------------------------------------------------------------|--------------------------------------------------------------------|--------------------------------------------------------------------|--------------------------------------------------------------------|--------------------------------------------------------------------|
| Pressure / GPa                                                                       | 1.51(2)                                                            | 1.91(2)                                                            | 2.65(2)                                                            | 3.02(2)                                                            | 3.56(4)                                                            |
| CCDC number                                                                          | 2336589                                                            | 2336590                                                            | 2336608                                                            | 2336609                                                            | 2336610                                                            |
| $\lambda$ / Å, radiation type                                                        | 0.4100, synchrotron                                                |                                                                    |                                                                    |                                                                    |                                                                    |
| <i>a</i> / Å                                                                         | 14.547(13)                                                         | 14.455(9)                                                          | 14.296(10)                                                         | 14.222(8)                                                          | 14.122(8)                                                          |
| <i>b</i> / Å                                                                         | 5.5258(3)                                                          | 5.4916(2)                                                          | 5.4336(3)                                                          | 5.4119(2)                                                          | 5.37914(19)                                                        |
| <i>c</i> / Å                                                                         | 11.659(4)                                                          | 11.591(3)                                                          | 11.476(3)                                                          | 11.430(2)                                                          | 11.365(2)                                                          |
| $\alpha$ / °                                                                         | 90                                                                 | 90                                                                 | 90                                                                 | 90                                                                 | 90                                                                 |
| $\beta$ / °                                                                          | 112.40(7)                                                          | 112.41(5)                                                          | 112.42(6)                                                          | 112.42(5)                                                          | 112.44(4)                                                          |
| $\gamma$ / °                                                                         | 90                                                                 | 90                                                                 | 90                                                                 | 90                                                                 | 90                                                                 |
| Volume / Å <sup>3</sup>                                                              | 866.5(9)                                                           | 850.6(6)                                                           | 824.1(7)                                                           | 813.2(6)                                                           | 797.9(5)                                                           |
| $\rho_{\text{calc}}$ / g·cm <sup>−3</sup>                                            | 1.397                                                              | 1.423                                                              | 1.469                                                              | 1.488                                                              | 1.517                                                              |
| $\mu$ / mm <sup>−1</sup>                                                             | 0.038                                                              | 0.039                                                              | 0.040                                                              | 0.040                                                              | 0.041                                                              |
| $\theta$ range / °                                                                   | 2.016 – 21.065                                                     | 2.313 – 21.167                                                     | 2.048 – 21.310                                                     | 2.056 – 21.400                                                     | 2.068 – 21.34                                                      |
| Unique reflections                                                                   | 4050                                                               | 3995                                                               | 3847                                                               | 3772                                                               | 3757                                                               |
| Unique or all reflections<br>[ <i>I</i> > 2 $\sigma$ ( <i>I</i> )]                   | 3314                                                               | 3372                                                               | 3201                                                               | 3202                                                               | 3261                                                               |
| Parameters / restraints                                                              | 138 / 96                                                           | 138 / 96                                                           | 138 / 6                                                            | 138 / 6                                                            | 138 / 6                                                            |
| GooF on <i>F</i> <sup>2</sup>                                                        | 1.071                                                              | 1.059                                                              | 1.056                                                              | 1.064                                                              | 1.066                                                              |
| <i>R</i> <sub>1</sub> , <i>wR</i> <sub>2</sub> [ <i>I</i> > 2 $\sigma$ ( <i>I</i> )] | <i>R</i> <sub>1</sub> = 0.0586,<br><i>wR</i> <sub>2</sub> = 0.1621 | <i>R</i> <sub>1</sub> = 0.0559,<br><i>wR</i> <sub>2</sub> = 0.1582 | <i>R</i> <sub>1</sub> = 0.0593,<br><i>wR</i> <sub>2</sub> = 0.1644 | <i>R</i> <sub>1</sub> = 0.0635,<br><i>wR</i> <sub>2</sub> = 0.1818 | <i>R</i> <sub>1</sub> = 0.0533,<br><i>wR</i> <sub>2</sub> = 0.1465 |
| <i>R</i> <sub>1</sub> , <i>wR</i> <sub>2</sub> (all data)                            | <i>R</i> <sub>1</sub> = 0.0687,<br><i>wR</i> <sub>2</sub> = 0.1708 | <i>R</i> <sub>1</sub> = 0.0644,<br><i>wR</i> <sub>2</sub> = 0.1660 | <i>R</i> <sub>1</sub> = 0.0685,<br><i>wR</i> <sub>2</sub> = 0.1724 | <i>R</i> <sub>1</sub> = 0.0706,<br><i>wR</i> <sub>2</sub> = 0.1891 | <i>R</i> <sub>1</sub> = 0.0598,<br><i>wR</i> <sub>2</sub> = 0.1522 |
| $\Delta\rho_{\text{max}} / \Delta\rho_{\text{min}}$ / e·Å <sup>−3</sup>              | 0.257 / −0.199                                                     | 0.384 / −0.235                                                     | 0.318 / −0.225                                                     | 0.470 / −0.260                                                     | 0.354 / −0.213                                                     |
| Disorder / %                                                                         | 7(1)                                                               | 5(1)                                                               | 4.5(8)                                                             | 4.7(8)                                                             | 4.4(8)                                                             |

**Table S2 (continued).**

|                                                                         |                                     |                                     |                                     |                                     |                                     |
|-------------------------------------------------------------------------|-------------------------------------|-------------------------------------|-------------------------------------|-------------------------------------|-------------------------------------|
| Pressure / GPa                                                          | 4.00(2)                             | 4.62(5)                             | 4.80(2)                             | 5.66(4)                             | 6.04(4)                             |
| CCDC number                                                             | 2336611                             | 2336612                             | 2336613                             | 2336614                             | 2336615                             |
| $\lambda$ / Å, radiation type                                           | 0.4100, synchrotron                 |                                     |                                     |                                     |                                     |
| $a$ / Å                                                                 | 14.037(7)                           | 13.935(7)                           | 13.912(7)                           | 13.808(7)                           | 13.767(7)                           |
| $b$ / Å                                                                 | 5.35545(18)                         | 5.32579(17)                         | 5.32080(18)                         | 5.29256(18)                         | 5.27967(16)                         |
| $c$ / Å                                                                 | 11.315(2)                           | 11.253(2)                           | 11.243(2)                           | 11.185(2)                           | 11.158(2)                           |
| $\alpha$ / °                                                            | 90                                  | 90                                  | 90                                  | 90                                  | 90                                  |
| $\beta$ / °                                                             | 112.49(4)                           | 112.51(4)                           | 112.55(4)                           | 112.58(4)                           | 112.60(4)                           |
| $\gamma$ / °                                                            | 90                                  | 90                                  | 90                                  | 90                                  | 90                                  |
| Volume / Å <sup>3</sup>                                                 | 785.9(5)                            | 771.5(5)                            | 768.6(5)                            | 754.7(5)                            | 748.8(4)                            |
| $\rho_{\text{calc}}$ / g·cm <sup>-3</sup>                               | 1.540                               | 1.569                               | 1.575                               | 1.604                               | 1.616                               |
| $\mu$ / mm <sup>-1</sup>                                                | 0.042                               | 0.043                               | 0.043                               | 0.044                               | 0.044                               |
| $\theta$ range / °                                                      | 2.077 – 21.401                      | 2.089 – 21.527                      | 2.090 – 21.549                      | 2.101 – 21.670                      | 2.106 – 21.435                      |
| Unique reflections                                                      | 3710                                | 3676                                | 3651                                | 3600                                | 3591                                |
| Unique or all reflections<br>[ $I > 2\sigma(I)$ ]                       | 3235                                | 3207                                | 3206                                | 3151                                | 3134                                |
| Parameters / restraints                                                 | 138 / 6                             | 138 / 6                             | 138 / 6                             | 138 / 6                             | 138 / 6                             |
| GooF on $F^2$                                                           | 1.064                               | 1.089                               | 1.084                               | 1.068                               | 1.077                               |
| $R_1, wR_2$ [ $I > 2\sigma(I)$ ]                                        | $R_1 = 0.0516$ ,<br>$wR_2 = 0.1460$ | $R_1 = 0.0502$ ,<br>$wR_2 = 0.1428$ | $R_1 = 0.0505$ ,<br>$wR_2 = 0.1402$ | $R_1 = 0.0509$ ,<br>$wR_2 = 0.1433$ | $R_1 = 0.0502$ ,<br>$wR_2 = 0.1399$ |
| $R_1, wR_2$ (all data)                                                  | $R_1 = 0.0573$ ,<br>$wR_2 = 0.1510$ | $R_1 = 0.0558$ ,<br>$wR_2 = 0.1474$ | $R_1 = 0.0557$ ,<br>$wR_2 = 0.1445$ | $R_1 = 0.0564$ ,<br>$wR_2 = 0.1479$ | $R_1 = 0.0559$ ,<br>$wR_2 = 0.1442$ |
| $\Delta\rho_{\text{max}} / \Delta\rho_{\text{min}}$ / e·Å <sup>-3</sup> | 0.388 / -0.208                      | 0.410 / -0.194                      | 0.385 / -0.185                      | 0.317 / -0.245                      | 0.398 / -0.180                      |
| Disorder / %                                                            | 4.1(9)                              | 4.7(9)                              | 4.9(9)                              | 5.2(9)                              | 6(1)                                |

**Table S2 (continued).**

|                                                                         |                                     |                                     |                                     |                                     |                                     |
|-------------------------------------------------------------------------|-------------------------------------|-------------------------------------|-------------------------------------|-------------------------------------|-------------------------------------|
| Pressure / GPa                                                          | 6.52(5)                             | 7.21(2)                             | 7.57(3)                             | 8.07(6)                             | 8.65(7)                             |
| CCDC number                                                             | 2336616                             | 2336617                             | 2336618                             | 2336619                             | 2336620                             |
| $\lambda$ / Å, radiation type                                           | 0.4100, synchrotron                 |                                     |                                     |                                     |                                     |
| $a$ / Å                                                                 | 13.693(8)                           | 13.618(6)                           | 13.573(7)                           | 13.529(8)                           | 13.462(8)                           |
| $b$ / Å                                                                 | 5.26420(19)                         | 5.24215(16)                         | 5.23258(19)                         | 5.2210(2)                           | 5.20920(19)                         |
| $c$ / Å                                                                 | 11.124(2)                           | 11.0763(19)                         | 11.057(2)                           | 11.031(2)                           | 11.001(2)                           |
| $\alpha$ / °                                                            | 90                                  | 90                                  | 90                                  | 90                                  | 90                                  |
| $\beta$ / °                                                             | 112.65(5)                           | 112.67(4)                           | 112.71(4)                           | 112.74(4)                           | 112.81(5)                           |
| $\gamma$ / °                                                            | 90                                  | 90                                  | 90                                  | 90                                  | 90                                  |
| Volume / Å <sup>3</sup>                                                 | 740.0(5)                            | 729.6(4)                            | 724.4(4)                            | 718.6(5)                            | 711.1(5)                            |
| $\rho_{\text{calc}}$ / g·cm <sup>-3</sup>                               | 1.636                               | 1.659                               | 1.671                               | 1.684                               | 1.702                               |
| $\mu$ / mm <sup>-1</sup>                                                | 0.044                               | 0.045                               | 0.045                               | 0.046                               | 0.046                               |
| $\theta$ range / °                                                      | 2.113 – 21.335                      | 2.122 – 21.430                      | 2.126 – 21.471                      | 2.310 – 21.522                      | 2.136 – 21.576                      |
| Unique reflections                                                      | 3440                                | 3392                                | 3384                                | 3401                                | 3383                                |
| Unique or all reflections<br>[ $I > 2\sigma(I)$ ]                       | 3013                                | 2961                                | 2959                                | 2937                                | 2934                                |
| Parameters / restraints                                                 | 138 / 6                             | 138 / 6                             | 138 / 6                             | 138 / 6                             | 138 / 96                            |
| GooF on $F^2$                                                           | 1.057                               | 1.069                               | 1.076                               | 1.091                               | 1.076                               |
| $R_1, wR_2$ [ $I > 2\sigma(I)$ ]                                        | $R_1 = 0.0510$ ,<br>$wR_2 = 0.1403$ | $R_1 = 0.0517$ ,<br>$wR_2 = 0.1414$ | $R_1 = 0.0535$ ,<br>$wR_2 = 0.1511$ | $R_1 = 0.0559$ ,<br>$wR_2 = 0.1561$ | $R_1 = 0.0624$ ,<br>$wR_2 = 0.1724$ |
| $R_1, wR_2$ (all data)                                                  | $R_1 = 0.0562$ ,<br>$wR_2 = 0.1442$ | $R_1 = 0.0575$ ,<br>$wR_2 = 0.1456$ | $R_1 = 0.0585$ ,<br>$wR_2 = 0.1549$ | $R_1 = 0.0623$ ,<br>$wR_2 = 0.1612$ | $R_1 = 0.0687$ ,<br>$wR_2 = 0.1783$ |
| $\Delta\rho_{\text{max}} / \Delta\rho_{\text{min}}$ / e·Å <sup>-3</sup> | 0.424 / -0.233                      | 0.405 / -0.220                      | 0.487 / -0.244                      | 0.482 / -0.251                      | 0.488 / -0.293                      |
| Disorder / %                                                            | 8(1)                                | 9(1)                                | 9(1)                                | 10(1)                               | 12(2)                               |

**Table S2 (continued).**

|                                                                         |                                                      |                                                      |                                                      |                                                      |                                                      |
|-------------------------------------------------------------------------|------------------------------------------------------|------------------------------------------------------|------------------------------------------------------|------------------------------------------------------|------------------------------------------------------|
| Pressure / GPa                                                          | 9.12(5)                                              | 9.51(4)                                              | 10.07(8)                                             | 10.58(8)                                             | 11.02(2)                                             |
| CCDC number                                                             | 2336621                                              | 2336622                                              | 2336567                                              | 2336568                                              | 2336569                                              |
| $\lambda$ / Å, radiation type                                           | 0.4100, synchrotron                                  |                                                      |                                                      |                                                      |                                                      |
| $a$ / Å                                                                 | 13.420(8)                                            | 13.377(7)                                            | 13.319(9)                                            | 13.261(8)                                            | 13.220(8)                                            |
| $b$ / Å                                                                 | 5.2012(2)                                            | 5.19477(16)                                          | 5.1800(2)                                            | 5.1782(2)                                            | 5.1750(2)                                            |
| $c$ / Å                                                                 | 10.982(2)                                            | 10.966(2)                                            | 10.928(3)                                            | 10.915(2)                                            | 10.904(3)                                            |
| $\alpha$ / °                                                            | 90                                                   | 90                                                   | 90                                                   | 90                                                   | 90                                                   |
| $\beta$ / °                                                             | 112.85(5)                                            | 112.89(4)                                            | 112.91(5)                                            | 113.01(5)                                            | 113.08(5)                                            |
| $\gamma$ / °                                                            | 90                                                   | 90                                                   | 90                                                   | 90                                                   | 90                                                   |
| Volume / Å <sup>3</sup>                                                 | 706.4(5)                                             | 702.0(4)                                             | 694.4(6)                                             | 689.9(5)                                             | 686.3(5)                                             |
| $\rho_{\text{calc}}$ / g·cm <sup>-3</sup>                               | 1.713                                                | 1.724                                                | 1.743                                                | 1.754                                                | 1.764                                                |
| $\mu$ / mm <sup>-1</sup>                                                | 0.047                                                | 0.047                                                | 0.047                                                | 0.048                                                | 0.048                                                |
| $\theta$ range / °                                                      | 2.140 – 21.613                                       | 2.143 – 21.643                                       | 2.151 – 21.711                                       | 2.153 – 21.642                                       | 2.342 – 21.659                                       |
| Unique reflections                                                      | 3336                                                 | 3333                                                 | 3233                                                 | 3215                                                 | 3125                                                 |
| Unique or all reflections<br>[I>2 $\sigma$ (I)]                         | 2920                                                 | 2920                                                 | 2778                                                 | 2740                                                 | 2534                                                 |
| Parameters / restraints                                                 | 138 / 96                                             | 138 / 6                                              | 138 / 6                                              | 138 / 6                                              | 138 / 12                                             |
| GooF on $F^2$                                                           | 1.070                                                | 1.052                                                | 1.066                                                | 1.068                                                | 1.070                                                |
| R <sub>1</sub> , wR <sub>2</sub> [I>2 $\sigma$ (I)]                     | R <sub>1</sub> = 0.0584,<br>wR <sub>2</sub> = 0.1585 | R <sub>1</sub> = 0.0601,<br>wR <sub>2</sub> = 0.1617 | R <sub>1</sub> = 0.0644,<br>wR <sub>2</sub> = 0.1757 | R <sub>1</sub> = 0.0684,<br>wR <sub>2</sub> = 0.1874 | R <sub>1</sub> = 0.0706,<br>wR <sub>2</sub> = 0.1966 |
| R <sub>1</sub> , wR <sub>2</sub> (all data)                             | R <sub>1</sub> = 0.0647,<br>wR <sub>2</sub> = 0.1637 | R <sub>1</sub> = 0.0664,<br>wR <sub>2</sub> = 0.1670 | R <sub>1</sub> = 0.0721,<br>wR <sub>2</sub> = 0.1822 | R <sub>1</sub> = 0.0763,<br>wR <sub>2</sub> = 0.1941 | R <sub>1</sub> = 0.0816,<br>wR <sub>2</sub> = 0.2064 |
| $\Delta\rho_{\text{max}} / \Delta\rho_{\text{min}}$ / e·Å <sup>-3</sup> | 0.510 / -0.306                                       | 0.521 / -0.340                                       | 0.568 / -0.366                                       | 0.530 / -0.411                                       | 0.495 / -0.396                                       |
| Disorder / %                                                            | 14(2)                                                | 16(2)                                                | 20(2)                                                | 23(2)                                                | 26(2)                                                |

**Table S2 (continued).**

|                                                                         |                                                      |                                                      |                                                      |                                                      |                                                      |
|-------------------------------------------------------------------------|------------------------------------------------------|------------------------------------------------------|------------------------------------------------------|------------------------------------------------------|------------------------------------------------------|
| Pressure / GPa                                                          | 11.54(4)                                             | 11.95(7)                                             | 12.68(5) <sup>a</sup>                                | 13.04(6) <sup>a</sup>                                | 13.04(6) <sup>a,b</sup>                              |
| CCDC number                                                             | 2336570                                              | 2336571                                              | 2336572                                              | 2336573                                              | 2336574                                              |
| $\lambda$ / Å, radiation type                                           | 0.4100, synchrotron                                  |                                                      |                                                      |                                                      |                                                      |
| $a$ / Å                                                                 | 13.162(11)                                           | 13.111(17)                                           | 13.08(2)                                             | 13.08(3)                                             | 12.452(8)                                            |
| $b$ / Å                                                                 | 5.1734(3)                                            | 5.1676(4)                                            | 5.1502(8)                                            | 5.1368(12)                                           | 5.4749(6)                                            |
| $c$ / Å                                                                 | 10.885(3)                                            | 10.860(5)                                            | 10.814(7)                                            | 10.777(9)                                            | 10.723(4)                                            |
| $\alpha$ / °                                                            | 90                                                   | 90                                                   | 90                                                   | 90                                                   | 90                                                   |
| $\beta$ / °                                                             | 113.15(7)                                            | 113.15(10)                                           | 113.12(14)                                           | 112.98(19)                                           | 114.90(7)                                            |
| $\gamma$ / °                                                            | 90                                                   | 90                                                   | 90                                                   | 90                                                   | 90                                                   |
| Volume / Å <sup>3</sup>                                                 | 681.5(7)                                             | 676.5(10)                                            | 670.0(14)                                            | 666.4(19)                                            | 663.0(6)                                             |
| $\rho_{\text{calc}}$ / g·cm <sup>-3</sup>                               | 1.776                                                | 1.789                                                | 1.806                                                | 1.816                                                | 1.825                                                |
| $\mu$ / mm <sup>-1</sup>                                                | 0.048                                                | 0.049                                                | 0.049                                                | 0.049                                                | 0.050                                                |
| $\theta$ range / °                                                      | 2.159 – 21.675                                       | 2.164 – 21.708                                       | 2.173 – 21.790                                       | 2.181 – 20.401                                       | 2.385 – 20.722                                       |
| Unique reflections                                                      | 2908                                                 | 2814                                                 | 777                                                  | 783                                                  | 1019                                                 |
| Unique or all reflections<br>[I>2 $\sigma$ (I)]                         | 2206                                                 | 2017                                                 | 559                                                  | 513                                                  | 638                                                  |
| Parameters / restraints                                                 | 138 / 12                                             | 138 / 102                                            | 137 / 102                                            | 137 / 102                                            | 127 / 84                                             |
| GooF on $F^2$                                                           | 1.103                                                | 1.142                                                | 1.344                                                | 1.180                                                | 0.954                                                |
| R <sub>1</sub> , wR <sub>2</sub> [I>2 $\sigma$ (I)]                     | R <sub>1</sub> = 0.0731,<br>wR <sub>2</sub> = 0.2059 | R <sub>1</sub> = 0.0765,<br>wR <sub>2</sub> = 0.2242 | R <sub>1</sub> = 0.0902,<br>wR <sub>2</sub> = 0.2457 | R <sub>1</sub> = 0.1062,<br>wR <sub>2</sub> = 0.2887 | R <sub>1</sub> = 0.0684,<br>wR <sub>2</sub> = 0.1727 |
| R <sub>1</sub> , wR <sub>2</sub> (all data)                             | R <sub>1</sub> = 0.0888,<br>wR <sub>2</sub> = 0.2192 | R <sub>1</sub> = 0.0966,<br>wR <sub>2</sub> = 0.2379 | R <sub>1</sub> = 0.1132,<br>wR <sub>2</sub> = 0.2604 | R <sub>1</sub> = 0.1379,<br>wR <sub>2</sub> = 0.3108 | R <sub>1</sub> = 0.0987,<br>wR <sub>2</sub> = 0.1857 |
| $\Delta\rho_{\text{max}} / \Delta\rho_{\text{min}}$ / e·Å <sup>-3</sup> | 0.420 / -0.367                                       | 0.451 / -0.372                                       | 0.289 / -0.220                                       | 0.282 / -0.281                                       | 0.232 / -0.240                                       |
| Disorder / %                                                            | 30(2)                                                | 33(2)                                                | 33(2)                                                | 33(2)                                                | 0                                                    |

<sup>a</sup> Refinement of a single data set of 1 crystal only. <sup>b</sup> Structure refinement of the high-pressure phase.

**Table S2 (continued).**

|                                                                         |                                                      |                                                      |                                                      |                                                      |                                                      |
|-------------------------------------------------------------------------|------------------------------------------------------|------------------------------------------------------|------------------------------------------------------|------------------------------------------------------|------------------------------------------------------|
| Pressure / GPa                                                          | 13.57(4)                                             | 14.12(10)                                            | 14.67(2)                                             | 14.93(3)                                             | 15.55(7)                                             |
| CCDC number                                                             | 2336575                                              | 2336576                                              | 2336577                                              | 2336578                                              | 2336579                                              |
| $\lambda$ / Å, radiation type                                           | 0.4100, synchrotron                                  |                                                      |                                                      |                                                      |                                                      |
| $a$ / Å                                                                 | 12.38(2)                                             | 12.32(2)                                             | 12.24(2)                                             | 12.230(15)                                           | 12.162(16)                                           |
| $b$ / Å                                                                 | 5.4468(7)                                            | 5.4498(7)                                            | 5.4747(6)                                            | 5.4789(4)                                            | 5.4949(4)                                            |
| $c$ / Å                                                                 | 10.725(6)                                            | 10.697(8)                                            | 10.639(7)                                            | 10.620(6)                                            | 10.602(6)                                            |
| $\alpha$ / °                                                            | 90                                                   | 90                                                   | 90                                                   | 90                                                   | 90                                                   |
| $\beta$ / °                                                             | 114.53(13)                                           | 114.60(15)                                           | 114.84(14)                                           | 114.88(11)                                           | 115.15(11)                                           |
| $\gamma$ / °                                                            | 90                                                   | 90                                                   | 90                                                   | 90                                                   | 90                                                   |
| Volume / Å <sup>3</sup>                                                 | 657.7(13)                                            | 653.0(14)                                            | 647.1(13)                                            | 645.5(10)                                            | 641.4(10)                                            |
| $\rho_{\text{calc}}$ / g·cm <sup>-3</sup>                               | 1.840                                                | 1.853                                                | 1.870                                                | 1.875                                                | 1.887                                                |
| $\mu$ / mm <sup>-1</sup>                                                | 0.050                                                | 0.050                                                | 0.051                                                | 0.051                                                | 0.051                                                |
| $\theta$ range / °                                                      | 2.191 – 21.372                                       | 2.397 – 21.395                                       | 2.209 – 21.408                                       | 2.213 – 21.420                                       | 2.216 – 21.412                                       |
| Unique reflections                                                      | 2814                                                 | 2541                                                 | 2408                                                 | 2764                                                 | 2608                                                 |
| Unique or all reflections<br>[I>2 $\sigma$ (I)]                         | 2063                                                 | 1843                                                 | 1818                                                 | 2213                                                 | 2079                                                 |
| Parameters / restraints                                                 | 128 / 84                                             | 128 / 84                                             | 128 / 84                                             | 128 / 84                                             | 128 / 84                                             |
| Goof on $F^2$                                                           | 1.096                                                | 1.025                                                | 1.116                                                | 1.116                                                | 1.138                                                |
| R <sub>1</sub> , wR <sub>2</sub> [I>2 $\sigma$ (I)]                     | R <sub>1</sub> = 0.0819,<br>wR <sub>2</sub> = 0.2257 | R <sub>1</sub> = 0.0810,<br>wR <sub>2</sub> = 0.2295 | R <sub>1</sub> = 0.0907,<br>wR <sub>2</sub> = 0.2564 | R <sub>1</sub> = 0.0847,<br>wR <sub>2</sub> = 0.2452 | R <sub>1</sub> = 0.0817,<br>wR <sub>2</sub> = 0.2356 |
| R <sub>1</sub> , wR <sub>2</sub> (all data)                             | R <sub>1</sub> = 0.1049,<br>wR <sub>2</sub> = 0.2412 | R <sub>1</sub> = 0.0994,<br>wR <sub>2</sub> = 0.2453 | R <sub>1</sub> = 0.1057,<br>wR <sub>2</sub> = 0.2777 | R <sub>1</sub> = 0.0946,<br>wR <sub>2</sub> = 0.2566 | R <sub>1</sub> = 0.0925,<br>wR <sub>2</sub> = 0.2476 |
| $\Delta\rho_{\text{max}} / \Delta\rho_{\text{min}}$ / e·Å <sup>-3</sup> | 0.397 / -0.275                                       | 0.421 / -0.304                                       | 0.421 / -0.297                                       | 0.497 / -0.280                                       | 0.388 / -0.282                                       |
| Disorder / %                                                            | 0                                                    | 0                                                    | 0                                                    | 0                                                    | 0                                                    |

**Table S2 (continued).**

|                                                                         |                                                      |                                                      |                                                      |                                                      |                                                      |
|-------------------------------------------------------------------------|------------------------------------------------------|------------------------------------------------------|------------------------------------------------------|------------------------------------------------------|------------------------------------------------------|
| Pressure / GPa                                                          | 16.27(8)                                             | 16.75(10)                                            | 17.25(8)                                             | 17.62(7)                                             | 17.98(4)                                             |
| CCDC number                                                             | 2336580                                              | 2336581                                              | 2336582                                              | 2336583                                              | 2336584                                              |
| $\lambda$ / Å, radiation type                                           | 0.4100, synchrotron                                  |                                                      |                                                      |                                                      |                                                      |
| $a$ / Å                                                                 | 12.096(15)                                           | 12.064(14)                                           | 12.013(14)                                           | 11.979(13)                                           | 11.945(14)                                           |
| $b$ / Å                                                                 | 5.5053(4)                                            | 5.5054(4)                                            | 5.5124(4)                                            | 5.5148(4)                                            | 5.5180(4)                                            |
| $c$ / Å                                                                 | 10.570(5)                                            | 10.545(5)                                            | 10.539(5)                                            | 10.530(5)                                            | 10.526(5)                                            |
| $\alpha$ / °                                                            | 90                                                   | 90                                                   | 90                                                   | 90                                                   | 90                                                   |
| $\beta$ / °                                                             | 115.42(11)                                           | 115.46(10)                                           | 115.68(10)                                           | 115.74(10)                                           | 115.90(11)                                           |
| $\gamma$ / °                                                            | 90                                                   | 90                                                   | 90                                                   | 90                                                   | 90                                                   |
| Volume / Å <sup>3</sup>                                                 | 635.8(10)                                            | 632.3(9)                                             | 629.0(9)                                             | 626.6(9)                                             | 624.1(9)                                             |
| $\rho_{\text{calc}}$ / g·cm <sup>-3</sup>                               | 1.904                                                | 1.914                                                | 1.924                                                | 1.932                                                | 1.939                                                |
| $\mu$ / mm <sup>-1</sup>                                                | 0.052                                                | 0.052                                                | 0.052                                                | 0.053                                                | 0.053                                                |
| $\theta$ range / °                                                      | 2.223 – 21.432                                       | 2.228 –<br>21.460                                    | 2.230 – 21.457                                       | 2.231 –<br>21.463                                    | 2.232 – 21.465                                       |
| Unique reflections                                                      | 2557                                                 | 2591                                                 | 2693                                                 | 2667                                                 | 2636                                                 |
| Unique or all reflections<br>[I>2 $\sigma$ (I)]                         | 2049                                                 | 2118                                                 | 2205                                                 | 2173                                                 | 2159                                                 |
| Parameters / restraints                                                 | 128 / 84                                             | 128 / 84                                             | 128 / 84                                             | 128 / 84                                             | 128 / 84                                             |
| Goof on $F^2$                                                           | 1.123                                                | 1.140                                                | 1.105                                                | 1.102                                                | 1.132                                                |
| R <sub>1</sub> , wR <sub>2</sub> [I>2 $\sigma$ (I)]                     | R <sub>1</sub> = 0.0687,<br>wR <sub>2</sub> = 0.2026 | R <sub>1</sub> = 0.0642,<br>wR <sub>2</sub> = 0.1906 | R <sub>1</sub> = 0.0603,<br>wR <sub>2</sub> = 0.1745 | R <sub>1</sub> = 0.0624,<br>wR <sub>2</sub> = 0.1788 | R <sub>1</sub> = 0.0628,<br>wR <sub>2</sub> = 0.1857 |
| R <sub>1</sub> , wR <sub>2</sub> (all data)                             | R <sub>1</sub> = 0.0778,<br>wR <sub>2</sub> = 0.2122 | R <sub>1</sub> = 0.0723,<br>wR <sub>2</sub> = 0.1988 | R <sub>1</sub> = 0.0679,<br>wR <sub>2</sub> = 0.1817 | R <sub>1</sub> = 0.0719,<br>wR <sub>2</sub> = 0.1867 | R <sub>1</sub> = 0.0711,<br>wR <sub>2</sub> = 0.1949 |
| $\Delta\rho_{\text{max}} / \Delta\rho_{\text{min}}$ / e·Å <sup>-3</sup> | 0.341 / -0.253                                       | 0.326 / -0.260                                       | 0.350 / -0.258                                       | 0.288 / -0.240                                       | 0.335 / -0.254                                       |
| Disorder / %                                                            | 0                                                    | 0                                                    | 0                                                    | 0                                                    | 0                                                    |

**Table S2 (continued).**

|                                                                         |                                    |                                    |                                    |                                    |                                    |
|-------------------------------------------------------------------------|------------------------------------|------------------------------------|------------------------------------|------------------------------------|------------------------------------|
| Pressure / GPa                                                          | 18.51(7)                           | 18.97(4)                           | 19.63(9)                           | 20.15(4)                           | 20.57(5)                           |
| CCDC number                                                             | 2336585                            | 2336586                            | 2336587                            | 2336591                            | 2336592                            |
| $\lambda$ / Å, radiation type                                           | 0.4100, synchrotron                |                                    |                                    |                                    |                                    |
| $a$ / Å                                                                 | 11.918(13)                         | 11.882(11)                         | 11.834(10)                         | 11.814(10)                         | 11.789(11)                         |
| $b$ / Å                                                                 | 5.5121(3)                          | 5.5101(3)                          | 5.5100(3)                          | 5.5065(2)                          | 5.5068(3)                          |
| $c$ / Å                                                                 | 10.502(5)                          | 10.490(4)                          | 10.478(4)                          | 10.466(4)                          | 10.461(5)                          |
| $\alpha$ / °                                                            | 90                                 | 90                                 | 90                                 | 90                                 | 90                                 |
| $\beta$ / °                                                             | 115.90(9)                          | 116.01(9)                          | 116.14(7)                          | 116.17(8)                          | 116.23(9)                          |
| $\gamma$ / °                                                            | 90                                 | 90                                 | 90                                 | 90                                 | 90                                 |
| Volume / Å <sup>3</sup>                                                 | 620.6(8)                           | 617.3(8)                           | 613.4(7)                           | 611.1(7)                           | 609.2(8)                           |
| $\rho_{\text{calc}}$ / g·cm <sup>-3</sup>                               | 1.950                              | 1.961                              | 1.973                              | 1.981                              | 1.987                              |
| $\mu$ / mm <sup>-1</sup>                                                | 0.053                              | 0.053                              | 0.054                              | 0.054                              | 0.054                              |
| $\theta$ range / °                                                      | 2.237 – 21.502                     | 2.240 – 21.522                     | 2.242 – 21.539                     | 2.245 – 21.560                     | 2.246 – 21.566                     |
| Unique reflections                                                      | 2903                               | 2831                               | 2815                               | 2829                               | 2583                               |
| Unique or all reflections<br>[ $I > 2\sigma(I)$ ]                       | 2484                               | 2423                               | 2376                               | 2393                               | 1922                               |
| Parameters / restraints                                                 | 128 / 84                           | 128 / 84                           | 128 / 84                           | 128 / 84                           | 128 / 84                           |
| GooF on $F^2$                                                           | 1.119                              | 1.097                              | 1.115                              | 1.103                              | 1.530                              |
| $R_1, wR_2$ [ $I > 2\sigma(I)$ ]                                        | $R_1 = 0.0606,$<br>$wR_2 = 0.1731$ | $R_1 = 0.0628,$<br>$wR_2 = 0.1789$ | $R_1 = 0.0722,$<br>$wR_2 = 0.2069$ | $R_1 = 0.0662,$<br>$wR_2 = 0.1912$ | $R_1 = 0.1256,$<br>$wR_2 = 0.3305$ |
| $R_1, wR_2$ (all data)                                                  | $R_1 = 0.0666,$<br>$wR_2 = 0.1788$ | $R_1 = 0.0686,$<br>$wR_2 = 0.1848$ | $R_1 = 0.0783,$<br>$wR_2 = 0.2130$ | $R_1 = 0.0728,$<br>$wR_2 = 0.1983$ | $R_1 = 0.1457,$<br>$wR_2 = 0.3640$ |
| $\Delta\rho_{\text{max}} / \Delta\rho_{\text{min}}$ / e·Å <sup>-3</sup> | 0.369 / -0.241                     | 0.333 / -0.338                     | 0.347 / -0.440                     | 0.389 / -0.329                     | 0.431 / -0.457                     |
| Disorder / %                                                            | 0                                  | 0                                  | 0                                  | 0                                  | 0                                  |

**Table S2 (continued).**

|                                                                         |                                    |                                    |                                    |                                    |                                    |
|-------------------------------------------------------------------------|------------------------------------|------------------------------------|------------------------------------|------------------------------------|------------------------------------|
| Pressure / GPa                                                          | 21.24(6)                           | 21.81(6)                           | 22.31(4)                           | 22.66(5)                           | 23.07(3)                           |
| CCDC number                                                             | 2336593                            | 2336594                            | 2336595                            | 2336596                            | 2336597                            |
| $\lambda$ / Å, radiation type                                           | 0.4100, synchrotron                |                                    |                                    |                                    |                                    |
| $a$ / Å                                                                 | 11.750(9)                          | 11.719(9)                          | 11.694(10)                         | 11.671(10)                         | 11.660(10)                         |
| $b$ / Å                                                                 | 5.5030(2)                          | 5.5018(2)                          | 5.4975(2)                          | 5.4939(2)                          | 5.4890(2)                          |
| $c$ / Å                                                                 | 10.447(4)                          | 10.440(4)                          | 10.427(4)                          | 10.418(4)                          | 10.407(4)                          |
| $\alpha$ / °                                                            | 90                                 | 90                                 | 90                                 | 90                                 | 90                                 |
| $\beta$ / °                                                             | 116.33(7)                          | 116.41(7)                          | 116.44(8)                          | 116.47(8)                          | 116.47(8)                          |
| $\gamma$ / °                                                            | 90                                 | 90                                 | 90                                 | 90                                 | 90                                 |
| Volume / Å <sup>3</sup>                                                 | 605.4(6)                           | 602.9(6)                           | 600.2(7)                           | 598.0(7)                           | 596.2(7)                           |
| $\rho_{\text{calc}}$ / g·cm <sup>-3</sup>                               | 1.999                              | 2.008                              | 2.016                              | 2.024                              | 2.030                              |
| $\mu$ / mm <sup>-1</sup>                                                | 0.054                              | 0.055                              | 0.055                              | 0.055                              | 0.055                              |
| $\theta$ range / °                                                      | 2.249 – 21.591                     | 2.251 – 21.604                     | 2.254 – 21.627                     | 2.255 – 21.644                     | 2.258 – 21.668                     |
| Unique reflections                                                      | 2730                               | 2695                               | 2649                               | 2848                               | 2805                               |
| Unique or all reflections<br>[ $I > 2\sigma(I)$ ]                       | 2256                               | 2195                               | 2132                               | 2381                               | 2309                               |
| Parameters / restraints                                                 | 128 / 84                           | 128 / 84                           | 128 / 84                           | 128 / 84                           | 128 / 84                           |
| GooF on $F^2$                                                           | 1.122                              | 1.162                              | 1.113                              | 1.117                              | 1.117                              |
| $R_1, wR_2$ [ $I > 2\sigma(I)$ ]                                        | $R_1 = 0.0757,$<br>$wR_2 = 0.2277$ | $R_1 = 0.0769,$<br>$wR_2 = 0.2354$ | $R_1 = 0.0693,$<br>$wR_2 = 0.2042$ | $R_1 = 0.0658,$<br>$wR_2 = 0.2016$ | $R_1 = 0.0687,$<br>$wR_2 = 0.2058$ |
| $R_1, wR_2$ (all data)                                                  | $R_1 = 0.0824,$<br>$wR_2 = 0.2360$ | $R_1 = 0.0852,$<br>$wR_2 = 0.2470$ | $R_1 = 0.0791,$<br>$wR_2 = 0.2151$ | $R_1 = 0.0732,$<br>$wR_2 = 0.2116$ | $R_1 = 0.0764,$<br>$wR_2 = 0.2143$ |
| $\Delta\rho_{\text{max}} / \Delta\rho_{\text{min}}$ / e·Å <sup>-3</sup> | 0.560 / -0.483                     | 0.566 / -0.432                     | 0.437 / -0.369                     | 0.460 / -0.445                     | 0.519 / -0.319                     |
| Disorder / %                                                            | 0                                  | 0                                  | 0                                  | 0                                  | 0                                  |

**Table S2 (continued).**

|                                                                         |                                                      |                                                      |                                                      |                                                      |                                                      |
|-------------------------------------------------------------------------|------------------------------------------------------|------------------------------------------------------|------------------------------------------------------|------------------------------------------------------|------------------------------------------------------|
| Pressure / GPa                                                          | 23.57(4)                                             | 24.11(4)                                             | 24.72(7)                                             | 25.50(7)                                             | 25.89(3)                                             |
| CCDC number                                                             | 2336598                                              | 2336599                                              | 2336600                                              | 2336601                                              | 2336602                                              |
| $\lambda$ / Å, radiation type                                           | 0.4100, synchrotron                                  |                                                      |                                                      |                                                      |                                                      |
| $a$ / Å                                                                 | 11.626(10)                                           | 11.592(9)                                            | 11.550(11)                                           | 11.513(11)                                           | 11.47(2)                                             |
| $b$ / Å                                                                 | 5.4869(2)                                            | 5.4837(2)                                            | 5.4830(3)                                            | 5.4804(3)                                            | 5.4795(5)                                            |
| $c$ / Å                                                                 | 10.397(4)                                            | 10.385(4)                                            | 10.377(4)                                            | 10.357(4)                                            | 10.352(8)                                            |
| $\alpha$ / °                                                            | 90                                                   | 90                                                   | 90                                                   | 90                                                   | 90                                                   |
| $\beta$ / °                                                             | 116.56(8)                                            | 116.64(7)                                            | 116.73(8)                                            | 116.78(9)                                            | 116.77(17)                                           |
| $\gamma$ / °                                                            | 90                                                   | 90                                                   | 90                                                   | 90                                                   | 90                                                   |
| Volume / Å <sup>3</sup>                                                 | 593.2(7)                                             | 590.1(6)                                             | 586.9(7)                                             | 583.4(7)                                             | 580.7(14)                                            |
| $\rho_{\text{calc}}$ / g·cm <sup>-3</sup>                               | 2.040                                                | 2.051                                                | 2.062                                                | 2.075                                                | 2.084                                                |
| $\mu$ / mm <sup>-1</sup>                                                | 0.055                                                | 0.056                                                | 0.056                                                | 0.056                                                | 0.057                                                |
| $\theta$ range / °                                                      | 2.260 – 21.685                                       | 2.263 – 21.707                                       | 2.264 – 21.719                                       | 2.269 – 21.747                                       | 2.270 – 21.752                                       |
| Unique reflections                                                      | 2737                                                 | 2705                                                 | 2286                                                 | 2373                                                 | 2488                                                 |
| Unique or all reflections<br>[I>2 $\sigma$ (I)]                         | 2268                                                 | 2201                                                 | 1894                                                 | 1959                                                 | 2015                                                 |
| Parameters / restraints                                                 | 128 / 84                                             | 129 / 84                                             | 128 / 84                                             | 128 / 84                                             | 128 / 84                                             |
| GooF on $F^2$                                                           | 1.092                                                | 1.113                                                | 1.251                                                | 1.335                                                | 1.170                                                |
| R <sub>1</sub> , wR <sub>2</sub> [I>2 $\sigma$ (I)]                     | R <sub>1</sub> = 0.0693,<br>wR <sub>2</sub> = 0.2057 | R <sub>1</sub> = 0.0675,<br>wR <sub>2</sub> = 0.2059 | R <sub>1</sub> = 0.0866,<br>wR <sub>2</sub> = 0.2686 | R <sub>1</sub> = 0.0923,<br>wR <sub>2</sub> = 0.2859 | R <sub>1</sub> = 0.0754,<br>wR <sub>2</sub> = 0.2348 |
| R <sub>1</sub> , wR <sub>2</sub> (all data)                             | R <sub>1</sub> = 0.0767,<br>wR <sub>2</sub> = 0.2140 | R <sub>1</sub> = 0.0762,<br>wR <sub>2</sub> = 0.2147 | R <sub>1</sub> = 0.0935,<br>wR <sub>2</sub> = 0.2812 | R <sub>1</sub> = 0.0996,<br>wR <sub>2</sub> = 0.3003 | R <sub>1</sub> = 0.0837,<br>wR <sub>2</sub> = 0.2448 |
| $\Delta\rho_{\text{max}} / \Delta\rho_{\text{min}}$ / e·Å <sup>-3</sup> | 0.542 / -0.371                                       | 0.422 / -0.405                                       | 0.667 / -0.536                                       | 0.725 / -0.449                                       | 0.690 / -0.380                                       |
| Disorder / %                                                            | 0                                                    | 0                                                    | 0                                                    | 0                                                    | 0                                                    |

**Table S2 (continued).**

|                                                                         |                                                      |                                                      |                                                      |                                                      |
|-------------------------------------------------------------------------|------------------------------------------------------|------------------------------------------------------|------------------------------------------------------|------------------------------------------------------|
| Pressure / GPa                                                          | 26.19(2)                                             | 26.61(6)                                             | 27.54(6)                                             | 28.21(11) <sup>a</sup>                               |
| CCDC number                                                             | 2336603                                              | 2336604                                              | 2336605                                              | 2336606                                              |
| $\lambda$ / Å, radiation type                                           | 0.4100, synchrotron                                  |                                                      |                                                      |                                                      |
| $a$ / Å                                                                 | 11.44(3)                                             | 11.43(3)                                             | 11.37(4)                                             | 11.26(5)                                             |
| $b$ / Å                                                                 | 5.4806(6)                                            | 5.4777(7)                                            | 5.4748(8)                                            | 5.4851(12)                                           |
| $c$ / Å                                                                 | 10.344(11)                                           | 10.328(10)                                           | 10.291(15)                                           | 10.25(2)                                             |
| $\alpha$ / °                                                            | 90                                                   | 90                                                   | 90                                                   | 90                                                   |
| $\beta$ / °                                                             | 116.8(2)                                             | 116.8(2)                                             | 116.8(3)                                             | 116.6(4)                                             |
| $\gamma$ / °                                                            | 90                                                   | 90                                                   | 90                                                   | 90                                                   |
| Volume / Å <sup>3</sup>                                                 | 579.3(18)                                            | 577.1(18)                                            | 572(3)                                               | 566(4)                                               |
| $\rho_{\text{calc}}$ / g·cm <sup>-3</sup>                               | 2.089                                                | 2.097                                                | 2.116                                                | 2.139                                                |
| $\mu$ / mm <sup>-1</sup>                                                | 0.057                                                | 0.057                                                | 0.058                                                | 0.058                                                |
| $\theta$ range / °                                                      | 2.272 – 21.758                                       | 2.275 – 21.782                                       | 2.283 – 20.916                                       | 2.293 – 20.731                                       |
| Unique reflections                                                      | 2459                                                 | 2350                                                 | 2135                                                 | 581                                                  |
| Unique or all reflections<br>[I>2 $\sigma$ (I)]                         | 1822                                                 | 1629                                                 | 1198                                                 | 278                                                  |
| Parameters / restraints                                                 | 128 / 84                                             | 128 / 84                                             | 128 / 84                                             | 127 / 84                                             |
| GooF on $F^2$                                                           | 1.165                                                | 1.158                                                | 1.609                                                | 1.362                                                |
| R <sub>1</sub> , wR <sub>2</sub> [I>2 $\sigma$ (I)]                     | R <sub>1</sub> = 0.0871,<br>wR <sub>2</sub> = 0.2703 | R <sub>1</sub> = 0.0896,<br>wR <sub>2</sub> = 0.2717 | R <sub>1</sub> = 0.1378,<br>wR <sub>2</sub> = 0.4255 | R <sub>1</sub> = 0.1517,<br>wR <sub>2</sub> = 0.3713 |
| R <sub>1</sub> , wR <sub>2</sub> (all data)                             | R <sub>1</sub> = 0.1014,<br>wR <sub>2</sub> = 0.2850 | R <sub>1</sub> = 0.1112,<br>wR <sub>2</sub> = 0.2923 | R <sub>1</sub> = 0.1903,<br>wR <sub>2</sub> = 0.4577 | R <sub>1</sub> = 0.2243,<br>wR <sub>2</sub> = 0.4140 |
| $\Delta\rho_{\text{max}} / \Delta\rho_{\text{min}}$ / e·Å <sup>-3</sup> | 0.809 / -0.391                                       | 0.718 / -0.477                                       | 0.798 / -0.651                                       | 0.258 / -0.290                                       |
| Disorder / %                                                            | 0                                                    | 0                                                    | 0                                                    | 0                                                    |

<sup>a</sup> Refinement of a single data sets of 1 crystal only.



**Table S3:** Pressure evolution of the unit cell parameters (distances in Å, angles in °, and volume in Å<sup>3</sup>) of crystal 1 of **azobenzene**, C<sub>12</sub>H<sub>10</sub>N<sub>2</sub>.

| Pressure (GPa)                 | <i>a</i> (Å) | <i>b</i> (Å) | <i>c</i> (Å) | $\alpha$ (°) | $\beta$ (°) | $\gamma$ (°) | <i>V</i> (Å <sup>3</sup> ) |
|--------------------------------|--------------|--------------|--------------|--------------|-------------|--------------|----------------------------|
| 0.0001 <sup>a</sup>            | 14.9840(4)   | 5.69830(10)  | 12.0341(3)   | 90           | 112.452(3)  | 90           | 949.63(4)                  |
| 0.0001 <sup>b</sup>            | 15.2269(4)   | 5.78897(13)  | 12.1743(3)   | 90           | 112.455(3)  | 90           | 991.78(5)                  |
| 0.0001                         | 15.223(14)   | 5.7851(5)    | 12.174(4)    | 90           | 112.45(7)   | 90           | 990.9(11)                  |
| 0.19(2)                        | 15.088(13)   | 5.7289(4)    | 12.059(4)    | 90           | 112.42(7)   | 90           | 963.6(10)                  |
| 0.31(2)                        | 14.998(11)   | 5.6940(3)    | 11.992(3)    | 90           | 112.43(6)   | 90           | 946.6(9)                   |
| 0.54(2)                        | 14.890(10)   | 5.6496(3)    | 11.905(3)    | 90           | 112.44(5)   | 90           | 925.6(7)                   |
| 1.02(2)                        | 14.710(10)   | 5.5772(3)    | 11.759(3)    | 90           | 112.39(5)   | 90           | 892.0(7)                   |
| 1.51(2)                        | 14.547(13)   | 5.5258(3)    | 11.659(4)    | 90           | 112.40(7)   | 90           | 866.5(9)                   |
| 1.91(2)                        | 14.455(9)    | 5.4916(2)    | 11.591(3)    | 90           | 112.41(5)   | 90           | 850.6(6)                   |
| 2.65(2)                        | 14.296(10)   | 5.4336(3)    | 11.476(3)    | 90           | 112.42(6)   | 90           | 824.1(7)                   |
| 3.02(2)                        | 14.222(8)    | 5.4119(2)    | 11.430(2)    | 90           | 112.42(5)   | 90           | 813.2(6)                   |
| 3.56(4)                        | 14.122(8)    | 5.37914(19)  | 11.365(2)    | 90           | 112.44(4)   | 90           | 797.9(5)                   |
| 4.00(2)                        | 14.037(7)    | 5.35545(18)  | 11.315(2)    | 90           | 112.49(4)   | 90           | 785.9(5)                   |
| 4.62(5)                        | 13.935(7)    | 5.32579(17)  | 11.253(2)    | 90           | 112.51(4)   | 90           | 771.5(5)                   |
| 4.80(2)                        | 13.912(7)    | 5.32080(18)  | 11.243(2)    | 90           | 112.55(4)   | 90           | 768.6(5)                   |
| 5.66(4)                        | 13.808(7)    | 5.29256(18)  | 11.185(2)    | 90           | 112.58(4)   | 90           | 754.7(5)                   |
| 6.04(4)                        | 13.767(7)    | 5.27967(16)  | 11.158(2)    | 90           | 112.60(4)   | 90           | 748.8(4)                   |
| 6.52(5)                        | 13.693(8)    | 5.26420(19)  | 11.124(2)    | 90           | 112.65(5)   | 90           | 740.0(5)                   |
| 7.21(2)                        | 13.618(6)    | 5.24215(16)  | 11.0763(19)  | 90           | 112.67(4)   | 90           | 729.6(4)                   |
| 7.57(3)                        | 13.573(7)    | 5.23258(19)  | 11.057(2)    | 90           | 112.71(4)   | 90           | 724.4(4)                   |
| 8.07(6)                        | 13.529(8)    | 5.2210(2)    | 11.031(2)    | 90           | 112.74(4)   | 90           | 718.6(5)                   |
| 8.65(7)                        | 13.462(8)    | 5.20920(19)  | 11.001(2)    | 90           | 112.81(5)   | 90           | 711.1(5)                   |
| 9.12(5)                        | 13.420(8)    | 5.2012(2)    | 10.982(2)    | 90           | 112.85(5)   | 90           | 706.4(5)                   |
| 9.51(4)                        | 13.377(7)    | 5.19477(16)  | 10.966(2)    | 90           | 112.89(4)   | 90           | 702.0(4)                   |
| 10.07(8)                       | 13.319(9)    | 5.1800(2)    | 10.928(3)    | 90           | 112.91(5)   | 90           | 694.4(6)                   |
| 10.58(8)                       | 13.261(8)    | 5.1782(2)    | 10.915(2)    | 90           | 113.01(5)   | 90           | 689.9(5)                   |
| 11.02(2)                       | 13.220(8)    | 5.1750(2)    | 10.904(3)    | 90           | 113.08(5)   | 90           | 686.3(5)                   |
| 11.54(4)                       | 13.162(11)   | 5.1734(3)    | 10.885(3)    | 90           | 113.15(7)   | 90           | 681.5(7)                   |
| 11.95(7)                       | 13.111(17)   | 5.1676(4)    | 10.860(5)    | 90           | 113.15(10)  | 90           | 676.5(10)                  |
| 12.68(5)                       | 13.08(2)     | 5.1502(8)    | 10.814(7)    | 90           | 113.12(14)  | 90           | 670.0(14)                  |
| 13.04(6)                       | 13.08(3)     | 5.1368(12)   | 10.777(9)    | 90           | 112.98(19)  | 90           | 666.4(19)                  |
| <b>High-pressure structure</b> |              |              |              |              |             |              |                            |
| 13.57(4)                       | 12.38(2)     | 5.4468(7)    | 10.725(6)    | 90           | 114.53(13)  | 90           | 657.7(13)                  |
| 14.12(10)                      | 12.32(2)     | 5.4498(7)    | 10.697(8)    | 90           | 114.60(15)  | 90           | 653.0(14)                  |
| 14.67(2)                       | 12.24(2)     | 5.4747(6)    | 10.639(7)    | 90           | 114.84(14)  | 90           | 647.1(13)                  |
| 14.93(3)                       | 12.230(15)   | 5.4789(4)    | 10.620(6)    | 90           | 114.88(11)  | 90           | 645.5(10)                  |
| 15.55(7)                       | 12.162(16)   | 5.4949(4)    | 10.602(6)    | 90           | 115.15(11)  | 90           | 641.4(10)                  |
| 16.27(8)                       | 12.096(15)   | 5.5053(4)    | 10.570(5)    | 90           | 115.42(11)  | 90           | 635.8(10)                  |
| 16.75(10)                      | 12.064(14)   | 5.5054(4)    | 10.545(5)    | 90           | 115.46(10)  | 90           | 632.3(9)                   |
| 17.25(8)                       | 12.013(14)   | 5.5124(4)    | 10.539(5)    | 90           | 115.68(10)  | 90           | 629.0(9)                   |
| 17.62(7)                       | 11.979(13)   | 5.5148(4)    | 10.530(5)    | 90           | 115.74(10)  | 90           | 626.6(9)                   |
| 17.98(4)                       | 11.945(14)   | 5.5180(4)    | 10.526(5)    | 90           | 115.90(11)  | 90           | 624.1(9)                   |
| 18.51(7)                       | 11.918(13)   | 5.5121(3)    | 10.502(5)    | 90           | 115.90(9)   | 90           | 620.6(8)                   |
| 18.97(4)                       | 11.882(11)   | 5.5101(3)    | 10.490(4)    | 90           | 116.01(9)   | 90           | 617.3(8)                   |
| 19.63(9)                       | 11.834(10)   | 5.5100(3)    | 10.478(4)    | 90           | 116.14(7)   | 90           | 613.4(7)                   |
| 20.15(4)                       | 11.814(10)   | 5.5065(2)    | 10.466(4)    | 90           | 116.17(8)   | 90           | 611.1(7)                   |
| 20.57(5)                       | 11.789(11)   | 5.5068(3)    | 10.461(5)    | 90           | 116.23(9)   | 90           | 609.2(8)                   |
| 21.24(6)                       | 11.750(9)    | 5.5030(2)    | 10.447(4)    | 90           | 116.33(7)   | 90           | 605.4(6)                   |
| 21.81(6)                       | 11.719(9)    | 5.5018(2)    | 10.440(4)    | 90           | 116.41(7)   | 90           | 602.9(6)                   |
| 22.31(4)                       | 11.694(10)   | 5.4975(2)    | 10.427(4)    | 90           | 116.44(8)   | 90           | 600.2(7)                   |
| 22.66(5)                       | 11.671(10)   | 5.4939(2)    | 10.418(4)    | 90           | 116.47(8)   | 90           | 598.0(7)                   |
| 23.07(3)                       | 11.660(10)   | 5.4890(2)    | 10.407(4)    | 90           | 116.47(8)   | 90           | 596.2(7)                   |
| 23.57(4)                       | 11.626(10)   | 5.4869(2)    | 10.397(4)    | 90           | 116.56(8)   | 90           | 593.2(7)                   |

<sup>a</sup>Data collected at 100 K on a free crystal.

<sup>b</sup>Data collected at 298 K on a free crystal.

**Table S3 (continued).**

| Pressure (GPa)                             | $a$ (Å)    | $b$ (Å)    | $c$ (Å)    | $\alpha$ (°) | $\beta$ (°) | $\gamma$ (°) | $V$ (Å <sup>3</sup> ) |
|--------------------------------------------|------------|------------|------------|--------------|-------------|--------------|-----------------------|
| <b>High-pressure structure (continued)</b> |            |            |            |              |             |              |                       |
| 24.11(4)                                   | 11.592(9)  | 5.4837(2)  | 10.385(4)  | 90           | 116.64(7)   | 90           | 590.1(6)              |
| 24.72(7)                                   | 11.550(11) | 5.4830(3)  | 10.377(4)  | 90           | 116.73(8)   | 90           | 586.9(7)              |
| 25.50(7)                                   | 11.513(11) | 5.4804(3)  | 10.357(4)  | 90           | 116.78(9)   | 90           | 583.4(7)              |
| 25.89(3)                                   | 11.47(2)   | 5.4795(5)  | 10.352(8)  | 90           | 116.77(17)  | 90           | 580.7(14)             |
| 26.19(2)                                   | 11.44(3)   | 5.4806(6)  | 10.344(11) | 90           | 116.8(2)    | 90           | 579.3(18)             |
| 26.61(6)                                   | 11.43(3)   | 5.4777(7)  | 10.328(10) | 90           | 116.8(2)    | 90           | 577.1(18)             |
| 27.54(6)                                   | 11.37(4)   | 5.4748(8)  | 10.291(15) | 90           | 116.8(3)    | 90           | 572(3)                |
| 28.21(11)                                  | 11.26(5)   | 5.4851(12) | 10.25(2)   | 90           | 116.6(4)    | 90           | 566(4)                |
| <b>Polymer structure</b>                   |            |            |            |              |             |              |                       |
| 29.04(12)                                  | 10.826(20) | 5.526(3)   | 10.088(18) | 90.05(7)     | 115.55(19)  | 89.60(8)     | 544(1)                |
| 29.66(5)                                   | 10.798(13) | 5.536(2)   | 9.892(9)   | 89.89(5)     | 115.51(10)  | 89.42(5)     | 533.7(8)              |
| 30.12(3)                                   | 10.745(14) | 5.533(2)   | 9.831(9)   | 89.84(5)     | 115.47(11)  | 89.36(6)     | 527.6(9)              |
| 30.91(14)                                  | 10.658(14) | 5.526(3)   | 9.751(10)  | 89.79(7)     | 115.52(12)  | 89.19(8)     | 518.2(9)              |
| 31.79(16)                                  | 10.55(2)   | 5.516(4)   | 9.728(15)  | 89.80(10)    | 115.43(18)  | 88.76(12)    | 511(1)                |
| 32.46(6)                                   | 10.514(18) | 5.522(5)   | 9.708(10)  | 89.82(8)     | 115.64(13)  | 88.70(11)    | 508(1)                |
| 31.58(5)                                   | 10.554(18) | 5.525(4)   | 9.692(13)  | 89.89(9)     | 115.40(15)  | 88.71(10)    | 510(1)                |
| 29.91(10)                                  | 10.623(13) | 5.551(3)   | 9.719(8)   | 90.04(6)     | 115.28(10)  | 89.19(8)     | 518.2(8)              |
| 27.0(2)                                    | 10.72(3)   | 5.573(3)   | 9.787(10)  | 89.95(7)     | 115.23(16)  | 89.23(10)    | 529(1)                |
| 22.3(2)                                    | 10.86(2)   | 5.617(4)   | 9.865(11)  | 90.04(7)     | 115.13(14)  | 89.39(10)    | 545(1)                |
| 16.74(14)                                  | 11.10(2)   | 5.680(3)   | 9.925(10)  | 90.00(6)     | 115.18(14)  | 89.24(9)     | 566(1)                |
| 10.78(18)                                  | 11.08(3)   | 5.772(5)   | 10.015(14) | 89.97(8)     | 114.81(18)  | 88.73(12)    | 581(2)                |

**Table S4:** Pressure evolution of the unit cell parameters (distances in Å, angles in °, and volume in Å<sup>3</sup>) of crystal 2 of **azobenzene**, C<sub>12</sub>H<sub>10</sub>N<sub>2</sub>.

| Pressure (GPa)                 | <i>a</i> (Å) | <i>b</i> (Å) | <i>c</i> (Å) | $\alpha$ (°) | $\beta$ (°) | $\gamma$ (°) | <i>V</i> (Å <sup>3</sup> ) |
|--------------------------------|--------------|--------------|--------------|--------------|-------------|--------------|----------------------------|
| 0.0001                         | 15.211(5)    | 5.7882(4)    | 12.180(2)    | 90           | 112.45(3)   | 90           | 991.1(4)                   |
| 0.19(2)                        | 15.075(3)    | 5.7301(3)    | 12.0638(15)  | 90           | 112.43(2)   | 90           | 963.2(3)                   |
| 0.31(2)                        | 15.002(3)    | 5.6999(2)    | 12.0055(12)  | 90           | 112.410(17) | 90           | 949.1(2)                   |
| 0.54(2)                        | 14.885(3)    | 5.6550(3)    | 11.9177(13)  | 90           | 112.438(18) | 90           | 927.2(2)                   |
| 1.02(2)                        | 14.691(2)    | 5.5786(2)    | 11.7656(10)  | 90           | 112.403(14) | 90           | 891.47(18)                 |
| 1.51(2)                        | 14.5468(19)  | 5.52668(18)  | 11.6630(9)   | 90           | 112.416(12) | 90           | 866.80(15)                 |
| 1.91(2)                        | 14.4494(19)  | 5.49181(18)  | 11.5946(9)   | 90           | 112.412(12) | 90           | 850.58(15)                 |
| 2.65(2)                        | 14.285(2)    | 5.43565(19)  | 11.4830(9)   | 90           | 112.407(13) | 90           | 824.34(15)                 |
| 3.02(2)                        | 14.2102(19)  | 5.41278(17)  | 11.4364(9)   | 90           | 112.427(12) | 90           | 813.12(14)                 |
| 3.56(4)                        | 14.108(2)    | 5.38006(18)  | 11.3693(9)   | 90           | 112.449(14) | 90           | 797.57(15)                 |
| 4.00(2)                        | 14.0259(17)  | 5.35781(16)  | 11.3215(8)   | 90           | 112.481(12) | 90           | 786.13(13)                 |
| 4.62(5)                        | 13.9288(19)  | 5.32813(17)  | 11.2618(9)   | 90           | 112.504(13) | 90           | 772.15(14)                 |
| 4.80(2)                        | 13.905(2)    | 5.3223(2)    | 11.2481(10)  | 90           | 112.526(15) | 90           | 768.95(16)                 |
| 5.66(4)                        | 13.800(2)    | 5.29508(20)  | 11.1842(10)  | 90           | 112.591(15) | 90           | 754.58(16)                 |
| 6.04(4)                        | 13.753(2)    | 5.28177(18)  | 11.1540(10)  | 90           | 112.591(14) | 90           | 748.08(15)                 |
| 6.52(5)                        | 13.683(2)    | 5.2664(2)    | 11.1168(12)  | 90           | 112.659(17) | 90           | 739.24(18)                 |
| 7.21(2)                        | 13.6073(19)  | 5.24975(17)  | 11.0762(9)   | 90           | 112.727(13) | 90           | 729.79(14)                 |
| 7.57(3)                        | 13.569(2)    | 5.24276(19)  | 11.0584(11)  | 90           | 112.753(15) | 90           | 725.45(16)                 |
| 8.07(6)                        | 13.511(2)    | 5.23092(19)  | 11.0297(11)  | 90           | 112.799(16) | 90           | 718.61(16)                 |
| 8.65(7)                        | 13.448(2)    | 5.2200(2)    | 11.0030(12)  | 90           | 112.851(17) | 90           | 711.76(17)                 |
| 9.12(5)                        | 13.401(2)    | 5.2116(2)    | 10.9887(12)  | 90           | 112.969(16) | 90           | 706.60(16)                 |
| 9.51(4)                        | 13.357(3)    | 5.2046(2)    | 10.9697(12)  | 90           | 113.036(18) | 90           | 701.77(18)                 |
| 10.07(8)                       | 13.285(3)    | 5.1976(3)    | 10.9473(15)  | 90           | 113.09(2)   | 90           | 695.4(2)                   |
| 10.58(8)                       | 13.245(3)    | 5.1945(3)    | 10.9341(16)  | 90           | 113.15(2)   | 90           | 691.7(2)                   |
| 11.02(2)                       | 13.203(4)    | 5.1900(4)    | 10.923(2)    | 90           | 113.13(3)   | 90           | 688.3(3)                   |
| 11.54(4)                       | 13.162(5)    | 5.1887(5)    | 10.910(3)    | 90           | 113.04(4)   | 90           | 685.6(4)                   |
| 11.95(7)                       | 13.128(7)    | 5.1793(6)    | 10.894(4)    | 90           | 112.83(5)   | 90           | 682.6(5)                   |
| 12.68(5)                       | 13.106(16)   | 5.1477(15)   | 10.792(8)    | 90           | 112.76(12)  | 90           | 671.4(11)                  |
| 13.04(6)                       | 13.14(2)     | 5.1504(18)   | 10.747(13)   | 90           | 112.89(17)  | 90           | 669.8(16)                  |
| <b>High-pressure structure</b> |              |              |              |              |             |              |                            |
| 13.04(6)                       | 12.452(8)    | 5.4749(6)    | 10.723(4)    | 90           | 114.90(7)   | 90           | 663.0(6)                   |
| 13.57(4)                       | 12.428(6)    | 5.4648(5)    | 10.666(4)    | 90           | 114.81(5)   | 90           | 657.5(5)                   |
| 14.12(10)                      | 12.366(7)    | 5.4796(5)    | 10.637(4)    | 90           | 114.90(6)   | 90           | 653.7(5)                   |
| 14.67(2)                       | 12.259(5)    | 5.5251(4)    | 10.661(3)    | 90           | 115.31(4)   | 90           | 652.8(4)                   |
| 14.93(3)                       | 12.215(6)    | 5.5184(5)    | 10.640(3)    | 90           | 115.40(5)   | 90           | 647.9(4)                   |
| 15.55(7)                       | 12.135(4)    | 5.5310(3)    | 10.639(2)    | 90           | 115.63(3)   | 90           | 643.8(3)                   |
| 16.27(8)                       | 12.049(4)    | 5.5387(3)    | 10.628(2)    | 90           | 115.87(3)   | 90           | 638.2(3)                   |
| 16.75(10)                      | 11.995(4)    | 5.5379(4)    | 10.620(2)    | 90           | 115.95(4)   | 90           | 634.3(3)                   |
| 17.25(8)                       | 11.949(5)    | 5.5329(4)    | 10.603(3)    | 90           | 115.99(4)   | 90           | 630.2(4)                   |
| 17.62(7)                       | 11.916(5)    | 5.5338(4)    | 10.599(3)    | 90           | 116.03(5)   | 90           | 628.0(4)                   |
| 17.98(4)                       | 11.881(5)    | 5.5332(4)    | 10.595(3)    | 90           | 116.10(5)   | 90           | 625.5(4)                   |
| 18.51(7)                       | 11.837(6)    | 5.5280(4)    | 10.570(3)    | 90           | 116.16(5)   | 90           | 620.8(4)                   |
| 18.97(4)                       | 11.799(6)    | 5.5261(4)    | 10.554(3)    | 90           | 116.22(5)   | 90           | 617.3(4)                   |
| 19.63(9)                       | 11.740(7)    | 5.5232(5)    | 10.541(4)    | 90           | 116.33(6)   | 90           | 612.6(5)                   |
| 20.15(4)                       | 11.708(7)    | 5.5183(5)    | 10.525(4)    | 90           | 116.36(6)   | 90           | 609.3(5)                   |
| 20.57(5)                       | 11.680(8)    | 5.5182(6)    | 10.524(5)    | 90           | 116.48(7)   | 90           | 607.1(6)                   |
| 21.24(6)                       | 11.639(8)    | 5.5134(6)    | 10.508(5)    | 90           | 116.56(8)   | 90           | 603.2(6)                   |
| 21.81(6)                       | 11.604(9)    | 5.5143(7)    | 10.505(6)    | 90           | 116.61(9)   | 90           | 601.0(7)                   |
| 22.31(4)                       | 11.570(8)    | 5.5129(6)    | 10.496(5)    | 90           | 116.72(8)   | 90           | 598.0(6)                   |
| 22.66(5)                       | 11.546(8)    | 5.5082(6)    | 10.487(5)    | 90           | 116.73(8)   | 90           | 595.6(6)                   |
| 23.07(3)                       | 11.528(8)    | 5.5043(6)    | 10.470(5)    | 90           | 116.77(7)   | 90           | 593.2(6)                   |
| 23.57(4)                       | 11.499(8)    | 5.5018(6)    | 10.462(5)    | 90           | 116.86(8)   | 90           | 590.4(6)                   |
| 24.11(4)                       | 11.456(9)    | 5.5006(7)    | 10.448(6)    | 90           | 116.93(9)   | 90           | 587.0(7)                   |
| 24.72(7)                       | 11.418(10)   | 5.4988(7)    | 10.462(7)    | 90           | 116.94(10)  | 90           | 585.6(8)                   |
| 25.50(7)                       | 11.388(10)   | 5.4948(7)    | 10.438(7)    | 90           | 116.99(10)  | 90           | 582.0(8)                   |
| 25.89(3)                       | 11.344(10)   | 5.4993(7)    | 10.411(6)    | 90           | 117.06(10)  | 90           | 578.4(8)                   |

**Table S4 (continued).**

| Pressure (GPa)                             | <i>a</i> (Å) | <i>b</i> (Å) | <i>c</i> (Å) | $\alpha$ (°) | $\beta$ (°) | $\gamma$ (°) | <i>V</i> (Å <sup>3</sup> ) |
|--------------------------------------------|--------------|--------------|--------------|--------------|-------------|--------------|----------------------------|
| <b>High-pressure structure (continued)</b> |              |              |              |              |             |              |                            |
| 26.19(2)                                   | 11.322(11)   | 5.5049(9)    | 10.404(7)    | 90           | 117.08(11)  | 90           | 577.3(9)                   |
| 26.61(6)                                   | 11.286(12)   | 5.5013(10)   | 10.388(8)    | 90           | 116.90(12)  | 90           | 575.2(10)                  |
| 27.54(6)                                   | 11.14(2)     | 5.535(2)     | 10.373(15)   | 90           | 117.0(2)    | 90           | 570.1(17)                  |
| <b>Polymer structure</b>                   |              |              |              |              |             |              |                            |
| 28.21(11)                                  | 11.101(13)   | 5.545(3)     | 9.990(14)    | 90.64(7)     | 115.59(12)  | 88.70(6)     | 554(1)                     |
| 29.04(12)                                  | 11.006(13)   | 5.553(3)     | 9.909(11)    | 90.76(8)     | 115.58(12)  | 88.33(7)     | 546(1)                     |
| 29.66(5)                                   | 10.865(16)   | 5.548(4)     | 9.863(13)    | 90.87(9)     | 115.79(14)  | 88.39(9)     | 535(1)                     |
| 30.12(3)                                   | 10.787(14)   | 5.544(4)     | 9.845(13)    | 90.85(10)    | 115.81(13)  | 88.52(9)     | 530(1)                     |
| 30.91(14)                                  | 10.744(13)   | 5.533(5)     | 9.805(14)    | 91.00(10)    | 115.84(13)  | 88.48(9)     | 524(1)                     |
| 31.79(16)                                  | 10.686(17)   | 5.531(4)     | 9.780(16)    | 91.03(10)    | 116.07(16)  | 88.45(9)     | 519(1)                     |
| 32.46(6)                                   | 10.647(18)   | 5.516(4)     | 9.769(14)    | 91.04(10)    | 115.86(15)  | 88.61(9)     | 516(1)                     |
| 31.58(5)                                   | 10.57(2)     | 5.523(5)     | 9.790(13)    | 91.06(10)    | 115.95(17)  | 88.89(11)    | 514(1)                     |
| 29.91(10)                                  | 10.633(12)   | 5.548(4)     | 9.789(11)    | 91.11(8)     | 115.99(11)  | 88.60(8)     | 518.9(9)                   |
| 27.0(2)                                    | 10.712(19)   | 5.585(6)     | 9.839(15)    | 90.90(13)    | 115.63(16)  | 88.38(12)    | 531(1)                     |
| 22.3(2)                                    | 10.818(18)   | 5.626(4)     | 9.840(9)     | 90.97(9)     | 116.11(14)  | 89.16(9)     | 538(1)                     |
| 16.74(14)                                  | 10.97(2)     | 5.699(5)     | 9.999(13)    | 91.19(10)    | 115.75(16)  | 88.63(10)    | 563(1)                     |
| 10.78(18)                                  | 11.22(3)     | 5.779(7)     | 10.016(14)   | 91.00(13)    | 115.0(2)    | 88.61(14)    | 588(2)                     |
| 6.0(4)                                     | 11.509(16)   | 5.875(5)     | 10.179(11)   | 91.02(11)    | 114.03(12)  | 88.70(10)    | 628(1)                     |
| 6.0(4)                                     | 11.574(15)   | 5.887(4)     | 10.182(18)   | 90.92(9)     | 114.07(15)  | 88.79(8)     | 633(1)                     |
| 1.28(2)                                    | 12.49(2)     | 6.106(6)     | 10.352(13)   | 90.70(10)    | 112.59(14)  | 89.29(11)    | 729(2)                     |

**Table S5:** Pressure evolution of the intramolecular separations,  $s$  (Å) and N–N–C–C dihedral angles (°) of **azobenzene**, C<sub>12</sub>H<sub>10</sub>N<sub>2</sub>.

| Pressure<br>(GPa)     | Intra-<br>planar<br>separation | N1–N1–C1–<br>C2 | N1–N1–<br>C1–C6 | Intraplanar<br>separation          | N2A–N2A–<br>C7–C12 | N2A–<br>N2A–C7–<br>C8 | N2B–<br>N2B–C7–<br>C12 | N2B–<br>N2B–<br>C7–C8 |
|-----------------------|--------------------------------|-----------------|-----------------|------------------------------------|--------------------|-----------------------|------------------------|-----------------------|
|                       | <b>Molecule A (N1)</b>         |                 |                 | <b>Molecule B (disordered, N2)</b> |                    |                       |                        |                       |
| 0.0001 <sup>a</sup>   | 0.369(3)                       | -161.86(11)     | 20.55(16)       | 0.200(3)                           | -170.37(12)        | 9.69(18)              |                        |                       |
| 0.0001 <sup>b</sup>   | 0.316(3)                       | -164.24(13)     | 17.79(18)       | 0.161(5)                           | -173.3(3)          | 6.4(4)                | -9.6(15)               | 171.5(9)              |
| 0.0001                | 0.332(10)                      | -163.9(5)       | 18.4(7)         | 0.16(2)                            | -174.3(7)          | 5.0(11)               | -9(7)                  | 172(4)                |
| 0.19(2)               | 0.332(11)                      | -163.3(5)       | 19.7(7)         | 0.18(2)                            | -173.1(7)          | 6.9(11)               | -11(7)                 | 171(4)                |
| 0.31(2)               | 0.339(9)                       | -162.9(5)       | 19.7(7)         | 0.188(18)                          | -172.8(6)          | 6.8(10)               | -7(7)                  | 173(4)                |
| 0.54(2)               | 0.338(8)                       | -162.5(4)       | 19.1(6)         | 0.188(15)                          | -172.0(5)          | 7.8(8)                | -8(7)                  | 172(4)                |
| 1.02(2)               | 0.323(8)                       | -162.5(4)       | 19.8(6)         | 0.216(14)                          | -170.6(4)          | 8.9(7)                | -13(9)                 | 169(5)                |
| 1.51(2)               | 0.326(8)                       | -162.1(4)       | 20.1(6)         | 0.231(14)                          | -169.7(5)          | 10.6(7)               | -16(11)                | 168(6)                |
| 1.91(2)               | 0.323(8)                       | -161.9(4)       | 20.0(6)         | 0.247(14)                          | -169.6(4)          | 10.5(7)               | -5(12)                 | 174(6)                |
| 2.65(2)               | 0.300(8)                       | -161.7(4)       | 21.0(6)         | 0.278(13)                          | -168.4(4)          | 11.6(7)               | -3(14)                 | 174(7)                |
| 3.02(2)               | 0.294(8)                       | -161.7(4)       | 21.2(6)         | 0.275(15)                          | -168.1(4)          | 12.0(7)               | -11(14)                | 170(7)                |
| 3.56(4)               | 0.281(8)                       | -161.7(4)       | 21.0(6)         | 0.294(12)                          | -167.5(4)          | 12.4(6)               | -15(14)                | 167(7)                |
| 4.00(2)               | 0.267(8)                       | -161.8(4)       | 21.7(6)         | 0.313(12)                          | -167.0(4)          | 12.5(6)               | -17(15)                | 165(8)                |
| 4.62(5)               | 0.265(8)                       | -162.2(4)       | 21.4(6)         | 0.321(13)                          | -166.7(4)          | 12.8(6)               | -20(14)                | 164(8)                |
| 4.80(2)               | 0.258(8)                       | -162.2(4)       | 21.3(6)         | 0.323(13)                          | -166.5(4)          | 12.9(6)               | -23(13)                | 162(7)                |
| 5.66(4)               | 0.242(8)                       | -162.0(4)       | 22.3(6)         | 0.336(14)                          | -165.9(4)          | 13.7(7)               | -17(13)                | 166(6)                |
| 6.04(4)               | 0.232(8)                       | -162.2(4)       | 21.9(6)         | 0.341(14)                          | -165.8(4)          | 14.0(7)               | -13(11)                | 167(6)                |
| 6.52(5)               | 0.226(8)                       | -162.1(4)       | 22.1(6)         | 0.357(14)                          | -165.3(5)          | 14.3(8)               | -13(10)                | 167(5)                |
| 7.21(2)               | 0.213(9)                       | -162.3(4)       | 22.4(6)         | 0.370(15)                          | -164.9(5)          | 14.0(8)               | -12(9)                 | 167(5)                |
| 7.57(3)               | 0.211(9)                       | -162.3(4)       | 22.2(6)         | 0.380(15)                          | -165.0(5)          | 14.1(8)               | -15(9)                 | 165(5)                |
| 8.07(6)               | 0.201(10)                      | -162.5(5)       | 22.4(7)         | 0.397(16)                          | -164.4(6)          | 14.6(9)               | -16(8)                 | 164(4)                |
| 8.65(7)               | 0.186(10)                      | -162.8(5)       | 22.2(7)         | 0.409(18)                          | -164.1(6)          | 14.2(10)              | -14(7)                 | 165(4)                |
| 9.12(5)               | 0.181(10)                      | -162.8(5)       | 21.9(7)         | 0.420(18)                          | -164.0(6)          | 14.4(10)              | -14(6)                 | 165(3)                |
| 9.51(4)               | 0.174(10)                      | -162.8(5)       | 22.0(7)         | 0.432(18)                          | -163.8(7)          | 14.5(11)              | -14(6)                 | 165(3)                |
| 10.07(8)              | 0.163(12)                      | -163.3(6)       | 21.5(8)         | 0.45(2)                            | -163.7(8)          | 14.3(13)              | -13(5)                 | 165(3)                |
| 10.58(8)              | 0.147(12)                      | -163.6(6)       | 21.5(9)         | 0.47(2)                            | -163.6(9)          | 14.0(14)              | -12(5)                 | 165(3)                |
| 11.02(2)              | 0.142(13)                      | -163.8(6)       | 21.4(9)         | 0.49(3)                            | -163.6(10)         | 13.5(16)              | -14(4)                 | 163(3)                |
| 11.54(4)              | 0.132(14)                      | -164.1(7)       | 21.7(10)        | 0.50(3)                            | -163.8(11)         | 12.3(18)              | -11(4)                 | 165(2)                |
| 11.95(7)              | 0.134(17)                      | -164.2(8)       | 21.2(11)        | 0.55(3)                            | -163.5(12)         | 12(2)                 | -13(4)                 | 163(2)                |
| 12.68(5)              | 0.17(2)                        | -165.5(11)      | 18.3(16)        | 0.52(5)                            | -163.8(15)         | 12(3)                 | -12(6)                 | 164(3)                |
| 13.04(6)              | 0.13(3)                        | -164.0(13)      | 23.4(18)        | 0.52(5)                            | -162.8(17)         | 11(3)                 | -13(6)                 | 162(4)                |
| 13.04(6) <sup>c</sup> | 0.069(12)                      | -168.2(5)       | 18.2(9)         | 0.150(17)                          | 172.2(4)           | -13.5(7)              |                        |                       |
| 13.57(4)              | 0.089(18)                      | -168.3(9)       | 19.1(12)        | 0.17(3)                            | 172.4(7)           | -13.7(11)             |                        |                       |
| 14.12(10)             | 0.090(17)                      | -168.9(9)       | 18.0(13)        | 0.19(3)                            | 172.2(7)           | -14.1(12)             |                        |                       |
| 14.67(2)              | 0.112(18)                      | -169.3(9)       | 19.6(13)        | 0.20(3)                            | 172.6(8)           | -14.7(12)             |                        |                       |
| 14.93(3)              | 0.126(16)                      | -169.4(8)       | 19.0(11)        | 0.19(2)                            | 171.7(7)           | -15.7(11)             |                        |                       |
| 15.55(7)              | 0.152(16)                      | -169.9(8)       | 18.7(11)        | 0.19(2)                            | 171.7(7)           | -15.7(11)             |                        |                       |
| 16.27(8)              | 0.150(14)                      | -169.8(7)       | 18.1(10)        | 0.22(2)                            | 170.8(6)           | -16.6(10)             |                        |                       |
| 16.75(10)             | 0.161(14)                      | -170.0(7)       | 17.5(10)        | 0.23(2)                            | 171.0(6)           | -16.5(9)              |                        |                       |
| 17.25(8)              | 0.172(13)                      | -170.2(6)       | 17.6(8)         | 0.22(2)                            | 171.0(5)           | -16.5(8)              |                        |                       |
| 17.62(7)              | 0.173(13)                      | -170.4(6)       | 17.4(8)         | 0.237(19)                          | 171.0(5)           | -16.7(8)              |                        |                       |
| 17.98(4)              | 0.177(13)                      | -170.2(6)       | 17.3(9)         | 0.23(2)                            | 170.7(5)           | -17.1(8)              |                        |                       |
| 18.51(7)              | 0.181(11)                      | -170.1(5)       | 17.7(8)         | 0.241(17)                          | 171.0(5)           | -16.7(7)              |                        |                       |
| 18.97(4)              | 0.190(12)                      | -170.3(6)       | 17.9(8)         | 0.238(18)                          | 170.9(5)           | -16.5(7)              |                        |                       |
| 19.63(9)              | 0.199(13)                      | -170.7(6)       | 17.0(9)         | 0.25(2)                            | 170.7(6)           | -17.1(9)              |                        |                       |
| 20.15(4)              | 0.208(13)                      | -170.7(6)       | 17.0(9)         | 0.250(19)                          | 171.0(5)           | -16.8(8)              |                        |                       |
| 20.57(5)              | 0.17(3)                        | -169.3(11)      | 17.4(17)        | 0.23(4)                            | 170.0(9)           | -15.3(15)             |                        |                       |
| 21.24(6)              | 0.203(15)                      | -170.4(7)       | 17.8(10)        | 0.25(2)                            | 171.4(6)           | -16.9(9)              |                        |                       |
| 21.81(6)              | 0.220(16)                      | -170.9(8)       | 17.5(11)        | 0.26(2)                            | 171.6(7)           | -17.1(10)             |                        |                       |

<sup>a</sup> Data collected at 100 K on a free crystal.

<sup>b</sup> Data collected at 298 K on a free crystal.

<sup>c</sup> High-pressure structure.

**Table S5 (continued).**

| Pressure<br>(GPa) | Intra-<br>planar<br>separation | N1–N1–C1–<br>C2 | N1–N1–<br>C1–C6 | Intraplanar<br>separation | N2A–N2A–<br>C7–C12 | N2A–<br>N2A–C7–<br>C8 | N2B–<br>N2B–C7–<br>C12 | N2B–<br>N2B–<br>C7–C8 |
|-------------------|--------------------------------|-----------------|-----------------|---------------------------|--------------------|-----------------------|------------------------|-----------------------|
| 22.31(4)          | 0.224(15)                      | -171.2(7)       | 17.3(10)        | 0.26(2)                   | 171.3(6)           | -16.9(9)              |                        |                       |
| 22.66(5)          | 0.221(13)                      | -170.8(6)       | 17.5(9)         | 0.262(19)                 | 171.6(5)           | -16.9(8)              |                        |                       |
| 23.07(3)          | 0.231(14)                      | -170.8(7)       | 18.0(9)         | 0.27(2)                   | 171.7(6)           | -16.4(9)              |                        |                       |
| 23.57(4)          | 0.234(13)                      | -170.8(6)       | 17.8(9)         | 0.267(19)                 | 171.3(5)           | -17.0(8)              |                        |                       |
| 24.11(4)          | 0.229(15)                      | -171.0(7)       | 17.3(10)        | 0.28(2)                   | 171.4(6)           | -16.8(9)              |                        |                       |
| 24.72(7)          | 0.261(17)                      | -171.2(8)       | 17.1(11)        | 0.29(3)                   | 171.9(7)           | -16.5(10)             |                        |                       |
| 25.50(7)          | 0.242(18)                      | -171.1(8)       | 16.8(13)        | 0.29(3)                   | 172.1(8)           | -16.0(11)             |                        |                       |
| 25.89(3)          | 0.225(19)                      | -170.7(9)       | 15.9(13)        | 0.30(3)                   | 172.8(8)           | -15.8(11)             |                        |                       |
| 26.19(2)          | 0.23(2)                        | -171.0(11)      | 16.2(15)        | 0.30(3)                   | 173.6(9)           | -15.3(14)             |                        |                       |
| 26.61(6)          | 0.24(3)                        | -170.4(12)      | 17.6(17)        | 0.32(4)                   | 173.4(11)          | -16.0(15)             |                        |                       |
| 27.54(6)          | 0.27(4)                        | -173(2)         | 15(3)           | 0.40(6)                   | 173.9(19)          | -17(3)                |                        |                       |
| 28.21(11)         | 0.25(6)                        | -169(3)         | 22(3)           | 0.55(9)                   | 172(3)             | -29(3)                |                        |                       |

**Table S6:** Pressure evolution of the nearest-neighbour intermolecular C $\cdots$ C and C $\cdots$ N distances (Å) of **azobenzene**, C<sub>12</sub>H<sub>10</sub>N<sub>2</sub> across the phase transition at 13 GPa and in the high-pressure phase. Red: no significant interaction.

| Pressure (GPa)        | C8 $\cdots$ C12 | C2 $\cdots$ C6 | C8 $\cdots$ C11 | C5 $\cdots$ C12 | C6 $\cdots$ C10 | C3 $\cdots$ C6 | C9 $\cdots$ C12 | C4 $\cdots$ C8 | C2 $\cdots$ C5 |
|-----------------------|-----------------|----------------|-----------------|-----------------|-----------------|----------------|-----------------|----------------|----------------|
| 10.58(8)              | 3.100           | 2.979          | 3.310           | 3.205           | 3.219           | 3.180          | 3.331           | 3.210          | 3.171          |
| 11.02(2)              | 3.092           | 2.967          | 3.301           | 3.196           | 3.212           | 3.168          | 3.323           | 3.192          | 3.159          |
| 11.54(4)              | 3.068           | 2.952          | 3.274           | 3.179           | 3.194           | 3.151          | 3.312           | 3.179          | 3.146          |
| 11.95(7)              | 3.058           | 2.938          | 3.270           | 3.161           | 3.195           | 3.134          | 3.307           | 3.163          | 3.136          |
| 12.68(5)              | 3.031           | 2.906          | 3.267           | 3.144           | 3.208           | 3.110          | 3.305           | 3.166          | 3.128          |
| 13.04(6)              | 3.019           | 2.887          | 3.250           | 3.153           | 3.196           | 3.097          | 3.336           | 3.169          | 3.124          |
| 13.04(6) <sup>a</sup> | 2.824           | 2.810          | 2.982           | 2.972           | 3.014           | 2.953          | 3.043           | 3.065          | 2.977          |
| 13.57(4)              | 2.806           | 2.813          | 2.963           | 2.956           | 3.017           | 2.947          | 3.022           | 3.034          | 2.969          |
| 14.12(10)             | 2.785           | 2.790          | 2.950           | 2.946           | 3.014           | 2.922          | 2.994           | 3.011          | 2.952          |
| 14.67(2)              | 2.759           | 2.764          | 2.915           | 2.923           | 2.979           | 2.915          | 2.972           | 2.992          | 2.937          |
| 14.93(3)              | 2.754           | 2.763          | 2.909           | 2.917           | 2.970           | 2.913          | 2.974           | 2.997          | 2.939          |
| 15.55(7)              | 2.735           | 2.758          | 2.880           | 2.904           | 2.944           | 2.905          | 2.957           | 2.975          | 2.923          |
| 16.27(8)              | 2.728           | 2.739          | 2.863           | 2.882           | 2.925           | 2.884          | 2.944           | 2.951          | 2.905          |
| 16.75(10)             | 2.723           | 2.736          | 2.856           | 2.868           | 2.912           | 2.878          | 2.937           | 2.942          | 2.906          |
| 17.25(8)              | 2.707           | 2.727          | 2.834           | 2.860           | 2.893           | 2.868          | 2.918           | 2.926          | 2.891          |
| 17.62(7)              | 2.703           | 2.720          | 2.824           | 2.847           | 2.884           | 2.865          | 2.911           | 2.917          | 2.879          |
| 17.98(4)              | 2.694           | 2.713          | 2.815           | 2.835           | 2.872           | 2.847          | 2.905           | 2.908          | 2.876          |
| 18.51(7)              | 2.689           | 2.707          | 2.808           | 2.830           | 2.8862          | 2.853          | 2.896           | 2.894          | 2.864          |
| 18.97(4)              | 2.682           | 2.697          | 2.801           | 2.819           | 2.849           | 2.843          | 2.885           | 2.887          | 2.854          |
| 19.63(9)              | 2.671           | 2.693          | 2.787           | 2.807           | 2.832           | 2.836          | 2.873           | 2.868          | 2.842          |
| 20.15(4)              | 2.666           | 2.687          | 2.785           | 2.803           | 2.830           | 2.825          | 2.867           | 2.865          | 2.839          |
| 20.57(5)              | 2.672           | 2.671          | 2.781           | 2.788           | 2.821           | 2.818          | 2.864           | 2.852          | 2.832          |
| 21.24(6)              | 2.652           | 2.669          | 2.766           | 2.784           | 2.809           | 2.810          | 2.846           | 2.844          | 2.822          |
| 21.81(6)              | 2.641           | 2.664          | 2.758           | 2.782           | 2.795           | 2.813          | 2.833           | 2.839          | 2.807          |
| 22.31(4)              | 2.637           | 2.657          | 2.754           | 2.772           | 2.793           | 2.800          | 2.827           | 2.831          | 2.805          |
| 22.66(5)              | 2.632           | 2.655          | 2.746           | 2.763           | 2.787           | 2.797          | 2.821           | 2.824          | 2.804          |
| 23.07(3)              | 2.631           | 2.650          | 2.744           | 2.757           | 2.782           | 2.796          | 2.826           | 2.822          | 2.795          |
| 23.57(4)              | 2.623           | 2.644          | 2.733           | 2.745           | 2.777           | 2.786          | 2.817           | 2.815          | 2.793          |
| 24.11(4)              | 2.620           | 2.634          | 2.723           | 2.734           | 2.767           | 2.778          | 2.808           | 2.801          | 2.782          |
| 24.72(7)              | 2.615           | 2.637          | 2.711           | 2.720           | 2.750           | 2.765          | 2.800           | 2.791          | 2.782          |
| 25.50(7)              | 2.608           | 2.623          | 2.687           | 2.694           | 2.740           | 2.766          | 2.789           | 2.783          | 2.775          |
| 25.89(3)              | 2.591           | 2.621          | 2.668           | 2.679           | 2.740           | 2.758          | 2.772           | 2.773          | 2.776          |
| 26.19(2)              | 2.576           | 2.612          | 2.643           | 2.673           | 2.735           | 2.743          | 2.753           | 2.771          | 2.773          |
| 26.61(6)              | 2.578           | 2.609          | 2.628           | 2.656           | 2.738           | 2.748          | 2.749           | 2.770          | 2.783          |
| 27.54(6)              | 2.573           | 2.609          | 2.566           | 2.585           | 2.743           | 2.761          | 2.751           | 2.772          | 2.803          |
| 28.21(11)             | 2.550           | 2.559          | 2.466           | 2.454           | 2.765           | 2.641          | 2.662           | 2.783          | 2.836          |

<sup>a</sup>High-pressure structure.

**Table S6 (continued).**

| Pressure (GPa)        | C1...C6 | C8...C7 | C9...C7 | C10...N2 | C4...N1 |
|-----------------------|---------|---------|---------|----------|---------|
| 10.58(8)              | 3.061   | 3.100   | 3.076   | 3.119    | 2.944   |
| 11.02(2)              | 3.053   | 3.095   | 3.079   | 3.099    | 2.931   |
| 11.54(4)              | 3.048   | 3.079   | 3.088   | 3.074    | 2.917   |
| 11.95(7)              | 3.034   | 3.069   | 3.102   | 3.033    | 2.903   |
| 12.68(5)              | 2.998   | 3.042   | 3.098   | 3.010    | 2.866   |
| 13.04(6)              | 2.990   | 3.032   | 3.136   | 3.013    | 2.865   |
| 13.04(6) <sup>a</sup> | 3.066   | 3.055   | 3.129   | 2.816    | 2.749   |
| 13.57(4)              | 3.069   | 3.041   | 3.111   | 2.794    | 2.750   |
| 14.12(10)             |         |         |         | 2.769    | 2.727   |
| 14.67(2)              |         |         |         | 2.745    | 2.717   |
| 14.93(3)              |         |         |         | 2.745    | 2.704   |
| 15.55(7)              |         |         |         | 2.722    | 2.694   |
| 16.27(8)              |         |         |         | 2.704    | 2.677   |
| 16.75(10)             |         |         |         | 2.694    | 2.666   |
| 17.25(8)              |         |         |         | 2.682    | 2.656   |
| 17.62(7)              |         |         |         | 2.673    | 2.652   |
| 17.98(4)              |         |         |         | 2.668    | 2.643   |
| 18.51(7)              |         |         |         | 2.656    | 2.641   |
| 18.97(4)              |         |         |         | 2.648    | 2.631   |
| 19.63(9)              |         |         |         | 2.638    | 2.621   |
| 20.15(4)              |         |         |         | 2.630    | 2.609   |
| 20.57(5)              |         |         |         | 2.630    | 2.616   |
| 21.24(6)              |         |         |         | 2.616    | 2.601   |
| 21.81(6)              |         |         |         | 2.609    | 2.589   |
| 22.31(4)              |         |         |         | 2.601    | 2.583   |
| 22.66(5)              |         |         |         | 2.592    | 2.584   |
| 23.07(3)              |         |         |         | 2.585    | 2.577   |
| 23.57(4)              |         |         |         | 2.578    | 2.566   |
| 24.11(4)              |         |         |         | 2.570    | 2.560   |
| 24.72(7)              |         |         |         | 2.556    | 2.549   |
| 25.50(7)              |         |         |         | 2.541    | 2.543   |
| 25.89(3)              |         |         |         | 2.522    | 2.542   |
| 26.19(2)              |         |         |         | 2.512    | 2.534   |
| 26.61(6)              |         |         |         | 2.508    | 2.529   |
| 27.54(6)              |         |         |         | 2.452    | 2.499   |
| 28.21(11)             |         |         |         | 2.452    | 2.523   |

<sup>a</sup>High-pressure structure.



**Table S7:** Pressure evolution of the  $\pi\cdots\pi$  intermolecular distances (Å) and the angles between plane normals (°) of phenyl rings of molecule A of the **azobenzene**, C<sub>12</sub>H<sub>10</sub>N<sub>2</sub>, high-pressure phase.

| Pressure<br>(GPa) | Centroid-<br>centroid<br>distance | Interplanar<br>separation 1 | Shift     | Interplanar<br>separation 2 | Shift     | Angle<br>between<br>planes |
|-------------------|-----------------------------------|-----------------------------|-----------|-----------------------------|-----------|----------------------------|
| 13.04(6)          | 3.996(4)                          | 3.529(4)                    | 1.875(8)  | 3.464(6)                    | 1.993(7)  | 33.7(2)                    |
| 13.57(4)          | 3.985(6)                          | 3.509(7)                    | 1.889(12) | 3.461(10)                   | 1.976(11) | 33.5(3)                    |
| 14.12(10)         | 3.970(7)                          | 3.492(7)                    | 1.889(11) | 3.424(11)                   | 2.009(11) | 32.7(3)                    |
| 14.67(2)          | 3.972(7)                          | 3.485(7)                    | 1.905(12) | 3.395(10)                   | 2.061(11) | 31.6(3)                    |
| 14.93(3)          | 3.970(6)                          | 3.479(6)                    | 1.914(10) | 3.383(9)                    | 2.078(9)  | 31.1(3)                    |
| 15.55(7)          | 3.969(6)                          | 3.469(6)                    | 1.928(10) | 3.360(9)                    | 2.112(9)  | 30.2(3)                    |
| 16.27(8)          | 3.957(5)                          | 3.458(6)                    | 1.923(9)  | 3.323(8)                    | 2.147(8)  | 29.5(3)                    |
| 16.75(10)         | 3.954(5)                          | 3.451(5)                    | 1.929(9)  | 3.311(8)                    | 2.160(8)  | 29.1(2)                    |
| 17.25(8)          | 3.948(5)                          | 3.445(5)                    | 1.928(8)  | 3.295(8)                    | 2.175(7)  | 28.7(2)                    |
| 17.62(7)          | 3.944(5)                          | 3.439(5)                    | 1.931(8)  | 3.282(8)                    | 2.188(7)  | 28.4(2)                    |
| 17.98(4)          | 3.937(5)                          | 3.434(5)                    | 1.926(9)  | 3.267(8)                    | 2.197(8)  | 28.1(2)                    |
| 18.51(7)          | 3.934(4)                          | 3.429(4)                    | 1.929(7)  | 3.259(7)                    | 2.203(6)  | 27.9(2)                    |
| 18.97(4)          | 3.926(4)                          | 3.421(4)                    | 1.926(7)  | 3.246(7)                    | 2.209(6)  | 27.7(2)                    |
| 19.63(9)          | 3.920(4)                          | 3.413(5)                    | 1.929(8)  | 3.231(7)                    | 2.221(7)  | 27.3(2)                    |
| 20.15(4)          | 3.913(4)                          | 3.407(5)                    | 1.924(8)  | 3.222(7)                    | 2.221(7)  | 27.3(2)                    |
| 20.57(5)          | 3.906(7)                          | 3.411(8)                    | 1.904(15) | 3.210(12)                   | 2.226(13) | 27.4(4)                    |
| 21.24(6)          | 3.902(5)                          | 3.399(5)                    | 1.916(9)  | 3.201(8)                    | 2.231(8)  | 27.0(3)                    |
| 21.81(6)          | 3.896(5)                          | 3.391(5)                    | 1.919(10) | 3.189(8)                    | 2.238(8)  | 26.7(3)                    |
| 22.31(4)          | 3.890(5)                          | 3.384(5)                    | 1.920(9)  | 3.179(8)                    | 2.243(8)  | 26.5(3)                    |
| 22.66(5)          | 3.888(4)                          | 3.382(5)                    | 1.918(8)  | 3.175(7)                    | 2.243(7)  | 26.5(2)                    |
| 23.07(3)          | 3.883(4)                          | 3.376(5)                    | 1.919(9)  | 3.168(7)                    | 2.245(7)  | 26.3(2)                    |
| 23.57(4)          | 3.877(4)                          | 3.372(5)                    | 1.914(8)  | 3.159(7)                    | 2.248(7)  | 26.2(2)                    |
| 24.11(4)          | 3.870(4)                          | 3.367(5)                    | 1.908(9)  | 3.147(8)                    | 2.253(8)  | 26.1(3)                    |
| 24.72(7)          | 3.865(5)                          | 3.355(6)                    | 1.918(11) | 3.135(9)                    | 2.261(9)  | 25.6(3)                    |
| 25.50(7)          | 3.860(5)                          | 3.350(6)                    | 1.918(11) | 3.119(9)                    | 2.275(9)  | 25.3(3)                    |
| 25.89(3)          | 3.856(7)                          | 3.347(7)                    | 1.915(12) | 3.107(12)                   | 2.284(10) | 25.1(4)                    |
| 26.19(2)          | 3.852(9)                          | 3.343(9)                    | 1.913(15) | 3.098(15)                   | 2.289(12) | 25.0(4)                    |
| 26.61(6)          | 3.854(9)                          | 3.345(9)                    | 1.914(16) | 3.101(15)                   | 2.289(14) | 25.0(5)                    |
| 27.54(6)          | 3.860(14)                         | 3.334(15)                   | 1.95(3)   | 3.09(2)                     | 2.31(2)   | 24.1(8)                    |
| 28.21(11)         | 3.84(2)                           | 3.28(2)                     | 1.99(4)   | 2.99(4)                     | 2.41(3)   | 21.0(11)                   |

**Table S8:** Pressure evolution of the  $\pi\cdots\pi$  intermolecular distances (Å) and the angles between plane normals (°) of phenyl rings of molecule B of the **azobenzene**, C<sub>12</sub>H<sub>10</sub>N<sub>2</sub>, high-pressure phase. Red: no significant interaction.

| Pressure (GPa) | Centroid-centroid distance | Interplanar separation 1 | Shift     | Interplanar separation 2 | Shift     | Angle between planes |
|----------------|----------------------------|--------------------------|-----------|--------------------------|-----------|----------------------|
| 13.04(6)       | 4.041(4)                   | 3.537(6)                 | 1.954(11) | 3.450(8)                 | 2.104(10) | 31.7(3)              |
| 13.57(4)       | 4.019(7)                   | 3.511(9)                 | 1.955(17) | 3.419(13)                | 2.112(15) | 31.2(5)              |
| 14.12(10)      | 4.002(7)                   | 3.481(9)                 | 1.975(17) | 3.374(13)                | 2.152(15) | 29.8(5)              |
| 14.67(2)       | 3.991(7)                   | 3.455(9)                 | 1.998(17) | 3.325(13)                | 2.208(14) | 28.1(5)              |
| 14.93(3)       | 3.991(6)                   | 3.452(8)                 | 2.002(15) | 3.315(12)                | 2.221(13) | 27.7(4)              |
| 15.55(7)       | 3.976(6)                   | 3.429(8)                 | 2.013(15) | 3.272(12)                | 2.258(13) | 26.5(4)              |
| 16.27(8)       | 3.966(6)                   | 3.404(8)                 | 2.035(13) | 3.236(11)                | 2.292(12) | 25.2(4)              |
| 16.75(10)      | 3.962(5)                   | 3.392(7)                 | 2.048(12) | 3.218(10)                | 2.311(11) | 24.5(4)              |
| 17.25(8)       | 3.949(5)                   | 3.377(7)                 | 2.047(12) | 3.188(10)                | 2.33(1)   | 23.9(4)              |
| 17.62(7)       | 3.944(5)                   | 3.369(6)                 | 2.049(11) | 3.176(10)                | 2.338(10) | 23.6(3)              |
| 17.98(4)       | 3.938(5)                   | 3.364(7)                 | 2.048(12) | 3.164(10)                | 2.345(10) | 23.3(4)              |
| 18.51(7)       | 3.391(4)                   | 3.352(6)                 | 2.053(10) | 3.147(9)                 | 2.355(9)  | 22.9(3)              |
| 18.97(4)       | 3.924(4)                   | 3.343(6)                 | 2.054(10) | 3.131(9)                 | 2.364(9)  | 22.5(3)              |
| 19.63(9)       | 3.914(4)                   | 3.329(7)                 | 2.058(12) | 3.11(1)                  | 2.376(10) | 22.0(4)              |
| 20.15(4)       | 3.909(4)                   | 3.322(7)                 | 2.060(12) | 3.10(1)                  | 2.381(10) | 21.8(3)              |
| 20.57(5)       | 3.904(7)                   | 3.324(12)                | 2.05(2)   | 3.094(18)                | 2.381(18) | 21.9(7)              |
| 21.24(6)       | 3.896(5)                   | 3.306(7)                 | 2.062(13) | 3.074(11)                | 2.395(11) | 21.2(4)              |
| 21.81(6)       | 3.889(5)                   | 3.297(8)                 | 2.063(14) | 3.058(12)                | 2.403(12) | 20.8(4)              |
| 22.31(4)       | 3.882(5)                   | 3.292(7)                 | 2.058(13) | 3.049(11)                | 2.403(10) | 20.8(4)              |
| 22.66(5)       | 3.877(4)                   | 3.286(6)                 | 2.056(11) | 3.042(10)                | 2.404(9)  | 20.7(3)              |
| 23.07(3)       | 3.876(4)                   | 3.283(7)                 | 2.060(12) | 3.038(11)                | 2.407(10) | 20.5(4)              |
| 23.57(4)       | 3.867(4)                   | 3.274(6)                 | 2.058(11) | 3.023(9)                 | 2.412(9)  | 20.3(3)              |
| 24.11(4)       | 3.860(5)                   | 3.264(7)                 | 2.061(12) | 3.009(11)                | 2.417(10) | 19.9(4)              |
| 24.72(7)       | 3.854(5)                   | 3.247(8)                 | 2.075(15) | 2.985(12)                | 2.437(12) | 19.1(5)              |
| 25.50(7)       | 3.842(6)                   | 3.239(9)                 | 2.066(16) | 2.970(14)                | 2.437(13) | 19.0(5)              |
| 25.89(3)       | 3.289(7)                   | 3.231(10)                | 2.054(17) | 2.951(15)                | 2.439(13) | 18.8(5)              |
| 26.19(2)       | 3.818(9)                   | 3.226(12)                | 2.04(2)   | 2.934(18)                | 2.442(16) | 18.7(6)              |
| 26.61(6)       | 3.812(9)                   | 3.216(13)                | 2.05(2)   | 2.93(2)                  | 2.444(18) | 18.5(7)              |
| 27.54(6)       | 3.788(14)                  | 3.19(2)                  | 2.04(4)   | 2.90(3)                  | 2.43(3)   | 18.2(11)             |
| 28.21(11)      | 3.75(2)                    | 3.20(3)                  | 1.97(5)   | 2.91(5)                  | 2.37(4)   | 19.8(16)             |

**Table S9:** Unit-cell parameters of the molecular and polymer phases of **azobenzene** obtained from single-crystal X-ray diffraction data of crystals (cry) 1 and 2, and from DFT calculations.

| Pressure (GPa)                           | $a$ (Å)    | $b$ (Å)    | $c$ (Å)    | $\alpha$ (°) | $\beta$ (°) | $\gamma$ (°) | $V$ (Å <sup>3</sup> ) |
|------------------------------------------|------------|------------|------------|--------------|-------------|--------------|-----------------------|
| <b>Molecular high-pressure structure</b> |            |            |            |              |             |              |                       |
| 27.54(6) cry 1                           | 11.37(4)   | 5.4748(8)  | 10.291(15) | 90           | 116.8(3)    | 90           | 572(3)                |
| 28.21(11) cry 1                          | 11.26(5)   | 5.4851(12) | 10.25(2)   | 90           | 116.6(4)    | 90           | 566(4)                |
| 27.54(6) cry 2                           | 11.14(2)   | 5.535(2)   | 10.373(15) | 90           | 117.0(2)    | 90           | 570.1(17)             |
| 30 DFT                                   | 11.2720    | 5.4153     | 10.2419    | 90           | 117.33      | 90           | 555.42                |
| <b>Polymer structure</b>                 |            |            |            |              |             |              |                       |
| 30.12(3) cry 1                           | 10.745(14) | 5.533(2)   | 9.831(9)   | 89.84(5)     | 115.47(11)  | 89.36(6)     | 527.6(9)              |
| 30.12(3) cry 2                           | 10.787(14) | 5.544(4)   | 9.845(13)  | 90.85(10)    | 115.81(13)  | 88.52(9)     | 530(1)                |
| 30 polymer I DFT                         | 10.2988    | 5.5182     | 10.2018    | 90           | 118.15      | 90           | 511.18                |
| 30 polymer II DFT                        | 9.7678     | 5.3372     | 9.9761     | 90           | 121.24      | 90           | 444.69                |

**Table S10:** Unit cell parameters and atomic coordinates ( $x\ y\ z$ ) of the molecular structure of **azobenzene** computed at 30 GPa. Atomic coordinates were taken from the computational output files and the structure was transformed from space group  $P1$  to  $P2_1/c$ .

Space group:  $P2_1/c$

$a = 11.2720\ \text{\AA}$ ,  $b = 5.4153\ \text{\AA}$ ,  $c = 10.2419\ \text{\AA}$ ,  $\alpha = 90.0^\circ$ ,  $\beta = 117.33^\circ$ ,  $\gamma = 90.0^\circ$

|     |         |          |         |
|-----|---------|----------|---------|
| N1  | 0.48915 | 0.11162  | 0.50779 |
| C1  | 0.41965 | 0.14254  | 0.58567 |
| C2  | 0.37985 | 0.37774  | 0.59621 |
| H2  | 0.39923 | 0.52187  | 0.53668 |
| C3  | 0.32598 | 0.41734  | 0.68981 |
| H3  | 0.30348 | 0.59601  | 0.71552 |
| C4  | 0.31821 | 0.22873  | 0.77316 |
| H4  | 0.28120 | 0.26933  | 0.84860 |
| C5  | 0.35942 | 0.99517  | 0.76411 |
| H5  | 0.36225 | 0.85590  | 0.83964 |
| C6  | 0.40716 | 0.95115  | 0.66685 |
| H6  | 0.44280 | 0.77490  | 0.65560 |
| N2  | 0.99156 | 0.11179  | 0.98205 |
| C7  | 0.92107 | 0.14461  | 0.83438 |
| C8  | 0.90296 | 0.95353  | 0.73832 |
| H8  | 0.93668 | 0.77652  | 0.78514 |
| C9  | 0.85108 | -0.00112 | 0.59215 |
| H9  | 0.84448 | 0.86048  | 0.51406 |
| C10 | 0.81800 | 0.23627  | 0.54588 |
| H10 | 0.78139 | 0.27425  | 0.43325 |
| C11 | 0.83542 | 0.42481  | 0.64042 |
| H11 | 0.81600 | 0.60564  | 0.59644 |
| C12 | 0.88560 | 0.38174  | 0.78722 |
| H12 | 0.90775 | 0.52368  | 0.86842 |

**Table S11:** Unit cell parameters and atomic coordinates ( $x\ y\ z$ ) of the polymer I structure of **azobenzene** computed at 30 GPa. Atomic coordinates were taken from the computational output files and the structure was transformed from space group  $P1$  to  $P2_1/c$ .

Space group:  $P2_1/c$

$a = 10.2988\ \text{\AA}$ ,  $b = 5.5182\ \text{\AA}$ ,  $c = 10.2018\ \text{\AA}$ ,  $\alpha = 90.0^\circ$ ,  $\beta = 118.15^\circ$ ,  $\gamma = 90.0^\circ$

|     |         |         |         |
|-----|---------|---------|---------|
| N1  | 0.49204 | 0.11368 | 0.52026 |
| C1  | 0.44286 | 0.13255 | 0.61461 |
| C2  | 0.43337 | 0.38243 | 0.65573 |
| H2  | 0.42487 | 0.50228 | 0.56783 |
| C3  | 0.32364 | 0.40971 | 0.70547 |
| H3  | 0.30305 | 0.58855 | 0.73048 |
| C4  | 0.30282 | 0.23655 | 0.78084 |
| H4  | 0.26571 | 0.29267 | 0.85626 |
| C5  | 0.31058 | 0.97762 | 0.76078 |
| H5  | 0.35996 | 0.88792 | 0.86848 |
| N2  | 0.97564 | 0.11499 | 0.98666 |
| C6  | 0.41799 | 0.93485 | 0.69995 |
| H6  | 0.40244 | 0.77754 | 0.63367 |
| C7  | 0.91831 | 0.16573 | 0.85003 |
| C8  | 0.94339 | 0.98522 | 0.75865 |
| H8  | 0.91394 | 0.81738 | 0.79024 |
| C9  | 0.85138 | 0.03710 | 0.60183 |
| H9  | 0.81597 | 0.89646 | 0.51895 |
| C10 | 0.82564 | 0.26785 | 0.56621 |
| H10 | 0.75408 | 0.32679 | 0.45760 |
| C11 | 0.88905 | 0.46118 | 0.67810 |
| H11 | 0.83976 | 0.62441 | 0.61990 |
| C12 | 0.85581 | 0.41083 | 0.80383 |
| H12 | 0.91909 | 0.53083 | 0.89642 |

**Table S12:** Unit cell parameters and atomic coordinates ( $x$   $y$   $z$ ) of the polymer II structure of **azobenzene** computed at 30 GPa. Atomic coordinates were taken from the computational output files and the structure was transformed from space group  $P1$  to  $P2_1/c$ .

Space group:  $P2_1/c$

$a = 9.7678$  Å,  $b = 5.3372$  Å,  $c = 9.9761$  Å,  $\alpha = 90.0^\circ$ ,  $\beta = 121.24^\circ$ ,  $\gamma = 90.0^\circ$

|     |         |         |         |
|-----|---------|---------|---------|
| N1  | 0.46338 | 0.11211 | 0.50812 |
| C1  | 0.36914 | 0.09019 | 0.58584 |
| C2  | 0.38592 | 0.36610 | 0.64724 |
| H2  | 0.36249 | 0.47998 | 0.54973 |
| C3  | 0.30327 | 0.44981 | 0.73271 |
| H3  | 0.38163 | 0.59476 | 0.80217 |
| C4  | 0.35035 | 0.26325 | 0.85738 |
| H4  | 0.25699 | 0.24471 | 0.87848 |
| C5  | 0.35345 | 0.98865 | 0.81944 |
| H5  | 0.41894 | 0.88970 | 0.92777 |
| C6  | 0.43306 | 0.91853 | 0.72882 |
| H6  | 0.39383 | 0.74167 | 0.67560 |
| N2  | 0.96598 | 0.12659 | 0.97269 |
| C7  | 0.84991 | 0.10515 | 0.80849 |
| C8  | 0.91972 | 0.95952 | 0.73013 |
| H8  | 0.89901 | 0.77652 | 0.75479 |
| C9  | 0.83862 | 0.00587 | 0.55269 |
| H9  | 0.89972 | 0.88143 | 0.51534 |
| C10 | 0.86334 | 0.28082 | 0.53634 |
| H10 | 0.74743 | 0.33527 | 0.45064 |
| C11 | 0.89991 | 0.44639 | 0.66936 |
| H11 | 0.85943 | 0.61761 | 0.60613 |
| C12 | 0.81790 | 0.38757 | 0.75719 |
| H12 | 0.88609 | 0.49205 | 0.86396 |

**Table S13:** C–C, C–N, and N–N bond lengths (Å) of the molecular, the polymer I, and the polymer II structure of **azobenzene** computed at 30 GPa.

| C/N–C/N (Å)          | Molecular | Polymer I | Polymer II |
|----------------------|-----------|-----------|------------|
| Molecule A           |           |           |            |
| C1–C2                | 1.371     | 1.458     | 1.571      |
| C2–C3                | 1.367     | 1.449     | 1.514      |
| C3–C4                | 1.360     | 1.306     | 1.469      |
| C4–C5                | 1.365     | 1.451     | 1.518      |
| C5–C6                | 1.353     | 1.521     | 1.514      |
| C1–C6                | 1.376     | 1.491     | 1.530      |
| C1–N1                | 1.361     | 1.286     | 1.484      |
| N1–N1                | 1.258     | 1.355     | 1.446      |
| Molecule B           |           |           |            |
| C7–C8                | 1.377     | 1.468     | 1.494      |
| C8–C9                | 1.356     | 1.452     | 1.539      |
| C9–C10               | 1.362     | 1.316     | 1.510      |
| C10–C11              | 1.358     | 1.471     | 1.476      |
| C11–C12              | 1.362     | 1.501     | 1.495      |
| C7–C12               | 1.366     | 1.476     | 1.570      |
| C7–N2                | 1.359     | 1.262     | 1.434      |
| N2–N2                | 1.254     | 1.345     | 1.480      |
| Intermolecular bonds |           |           |            |
| C2–C6                |           | 1.571     | 1.570      |
| C8–C11               |           | 1.537     | 1.511      |
| C5–C12               |           | 1.562     | 1.533      |
| C3–C7                |           |           | 1.568      |
| C1–C9                |           |           | 1.839      |
| C4–N1                |           |           | 1.484      |
| C10–N2               |           |           | 1.520      |

**Table S14:** Coordinates of the reciprocal and real unit cell axes of the two azobenzene crystals loaded in the DAC for data collection at 0.19(2) GPa with respect to an orthogonal reference system. The frame of reference ( $xyz$ ) is shown in Figure S7; the  $x$  axis corresponds to the direction of the incident X-ray beam, while the crystals inside the DAC lie on the perpendicular plane  $yz$ .

| Crystal 1                        |          |          |          |                       |          |           |           |
|----------------------------------|----------|----------|----------|-----------------------|----------|-----------|-----------|
| Reciprocal ( $\text{\AA}^{-1}$ ) | x        | y        | z        | Real ( $\text{\AA}$ ) | x        | y         | z         |
| $a^*$                            | -0.04197 | -0.07532 | -0.02469 | a                     | -1.1635  | -11.54121 | -3.31327  |
| $b^*$                            | -0.01495 | -0.04658 | 0.16751  | b                     | 0.48778  | 1.53139   | -5.50009  |
| $c^*$                            | -0.07117 | 0.00833  | -0.00399 | c                     | -13.2606 | 7.12681   | 0.79875   |
| Crystal 2                        |          |          |          |                       |          |           |           |
| Reciprocal ( $\text{\AA}^{-1}$ ) | x        | y        | z        | Real ( $\text{\AA}$ ) | x        | y         | z         |
| $a^*$                            | 0.04794  | 0.02034  | -0.07301 | a                     | 2.55775  | 0.95544   | -11.75155 |
| $b^*$                            | -0.07171 | 0.15913  | -0.00267 | b                     | 2.35264  | -5.22248  | 0.0897    |
| $c^*$                            | 0.06361  | 0.02893  | 0.0162   | c                     | 11.14078 | 5.16737   | 8.75637   |
